# Supplementary material
Source: PubMed Central journal article supplement (PMC8293692)
Supplement: NIHMS1723840-supplement-jm0c01671_si_001_pdf.pdf [file NIHMS1723840-supplement-jm0c01671_si_001_pdf.pdf]

**Supporting Information For:**

Novel TPP<sup>+</sup> carrier to target mitochondria without uncoupling oxidative phosphorylation

*Chaitanya A. Kulkarni,<sup>†,||</sup> Brian D. Fink,<sup>‡</sup> Bettine E. Gibbs<sup>†,⊥</sup>, Pratik R. Chheda<sup>†</sup>, Meng Wu<sup>†,§</sup>, William I.*

*Sivitz<sup>†</sup> and Robert J. Kerns<sup>\*,†</sup>*

<sup>†</sup>Division of Medicinal and Natural Products Chemistry, Department of Pharmaceutical Sciences and Experimental Therapeutics, University of Iowa, Iowa City, Iowa, 52242 USA.

<sup>‡</sup>Division of Endocrinology and Metabolism, Department of Internal Medicine, University of Iowa and the Iowa City Veterans Affairs Medical Center, Iowa City, Iowa, 52246 USA.

<sup>§</sup>University of Iowa High Throughput Screening Facility (UIHTS), University of Iowa, Iowa City, Iowa, 52242 USA

## Table of Contents

|                             |               |
|-----------------------------|---------------|
| <b>Supplemental Tables</b>  | <b>Page 4</b> |
| Supplemental Table S1       | Page 4        |
| Supplemental Table S2       | Page 5        |
| Supplemental Table S3       | Page 6        |
| Supplemental Table S4       | Page 7        |
| <br>                        |               |
| <b>Supplemental Figures</b> | <b>Page 8</b> |
| Supplemental Figure S1      | Page 8        |
| Supplemental Figure S2      | Page 9        |
| Supplemental Figure S3      | Page 10       |
| Supplemental Figure S4      | Page 11       |
| Supplemental Figure S5      | Page 12       |
| Supplemental Figure S6      | Page 14       |
| Supplemental Figure S7      | Page 14       |
| Supplemental Figure S8      | Page 15       |
| Supplemental Figure S9      | Page 15       |
| Supplemental Figure S10     | Page 16       |
| Supplemental Figure S11     | Page 16       |
| Supplemental Figure S12     | Page 17       |
| Supplemental Figure S13     | Page 17       |
| Supplemental Figure S14     | Page 18       |
| Supplemental Figure S15     | Page 18       |
| Supplemental Figure S16     | Page 19       |
| Supplemental Figure S17     | Page 19       |
| Supplemental Figure S18     | Page 20       |
| Supplemental Figure S19     | Page 20       |
| Supplemental Figure S20     | Page 21       |
| Supplemental Figure S21     | Page 21       |
| Supplemental Figure S22     | Page 22       |
| Supplemental Figure S23     | Page 22       |
| Supplemental Figure S24     | Page 23       |
| Supplemental Figure S25     | Page 23       |
| Supplemental Figure S26     | Page 24       |
| Supplemental Figure S27     | Page 24       |
| Supplemental Figure S28     | Page 25       |
| Supplemental Figure S29     | Page 25       |
| Supplemental Figure S30     | Page 26       |
| Supplemental Figure S31     | Page 26       |
| Supplemental Figure S32     | Page 27       |
| Supplemental Figure S33     | Page 27       |

|                                |                |
|--------------------------------|----------------|
| <b>Supplemental Figure S34</b> | <b>Page 28</b> |
| <b>Supplemental Figure S35</b> | <b>Page 28</b> |
| <b>Supplemental Figure S36</b> | <b>Page 29</b> |
| <b>Supplemental Figure S37</b> | <b>Page 29</b> |
| <b>Supplemental Figure S38</b> | <b>Page 30</b> |
| <b>Supplemental Figure S39</b> | <b>Page 30</b> |
| <b>Supplemental Figure S40</b> | <b>Page 31</b> |
| <b>Supplemental Figure S41</b> | <b>Page 31</b> |
| <b>Supplemental Figure S42</b> | <b>Page 32</b> |
| <b>Supplemental Figure S43</b> | <b>Page 32</b> |
| <b>Supplemental Figure S44</b> | <b>Page 33</b> |
| <b>Supplemental Figure S45</b> | <b>Page 33</b> |
| <b>Supplemental Figure S46</b> | <b>Page 34</b> |
| <b>Supplemental Figure S47</b> | <b>Page 34</b> |
| <b>Supplemental Figure S48</b> | <b>Page 35</b> |
| <b>Supplemental Figure S49</b> | <b>Page 35</b> |
| <b>Supplemental Figure S50</b> | <b>Page 36</b> |
| <b>Supplemental Figure S51</b> | <b>Page 36</b> |
| <b>Supplemental Figure S52</b> | <b>Page 37</b> |
| <b>Supplemental Figure S53</b> | <b>Page 37</b> |
| <b>Supplemental Figure S54</b> | <b>Page 38</b> |
| <b>Supplemental Figure S55</b> | <b>Page 38</b> |
| <b>Supplemental Figure S56</b> | <b>Page 39</b> |
| <b>Supplemental Figure S57</b> | <b>Page 39</b> |
| <b>Supplemental Figure S58</b> | <b>Page 40</b> |
| <b>Supplemental Figure S59</b> | <b>Page 40</b> |
| <b>Supplemental Figure S60</b> | <b>Page 41</b> |
| <b>Supplemental Figure S61</b> | <b>Page 41</b> |

**Supplemental Tables:**

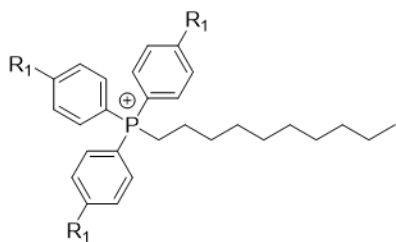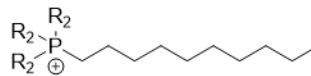

| Sr. No.              | R <sub>1</sub>       | Hückel charge | Sr. No. | R <sub>2</sub>    | Hückel charge |
|----------------------|----------------------|---------------|---------|-------------------|---------------|
| 1                    | -H                   | 0.326         | 15      | Pentafluorophenyl | 0.305         |
| Electron Withdrawing |                      |               | 16      | 4-Pyridyl         | 0.360         |
| 2                    | -CF <sub>3</sub>     | 0.523         |         |                   |               |
| 3                    | -NO <sub>2</sub>     | 0.388         |         |                   |               |
| 4                    | -CN                  | 0.377         |         |                   |               |
| 5                    | -COOH                | 0.349         |         |                   |               |
| 6                    | -SO <sub>3</sub> H   | 0.326         |         |                   |               |
| 7                    | -COOCH <sub>3</sub>  | 0.349         |         |                   |               |
| 8                    | -Cl                  | 0.328         |         |                   |               |
| 9                    | -F                   | 0.328         |         |                   |               |
| Electron Donating    |                      |               |         |                   |               |
| 10                   | -NH <sub>2</sub>     | 0.294         |         |                   |               |
| 11                   | -OH                  | 0.299         |         |                   |               |
| 12                   | -OCH <sub>3</sub>    | 0.299         |         |                   |               |
| 13                   | -CH <sub>3</sub>     | 0.310         |         |                   |               |
| 14                   | -NHCOCH <sub>3</sub> | 0.288         |         |                   |               |

Supplemental Table S1: Hückel charge calculations for charge density on the phosphorus atom of various aryl-modified TPP<sup>+</sup>-decyl conjugates.

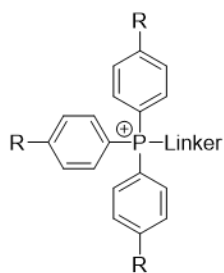

| Sr. No. | R                 | Linker | cLogP  |
|---------|-------------------|--------|--------|
| 1       | -OCH <sub>3</sub> | Decyl  | 8.399  |
| 2       | -CH <sub>3</sub>  | Decyl  | 9.425  |
| 3       | -H                | Decyl  | 8.531  |
| 4       | -Cl               | Decyl  | 10.307 |
| 5       | -F                | Decyl  | 8.990  |
| 6       | -CF <sub>3</sub>  | Decyl  | 11.335 |
| 7       | -OCH <sub>3</sub> | Butyl  | 5.747  |
| 8       | -CH <sub>3</sub>  | Butyl  | 6.773  |
| 9       | -H                | Butyl  | 5.879  |
| 10      | -Cl               | Butyl  | 7.655  |
| 11      | -F                | Butyl  | 6.337  |
| 12      | -CF <sub>3</sub>  | Butyl  | 8.683  |
| 13      | -OCH <sub>3</sub> | Benzyl | 6.138  |
| 14      | -CH <sub>3</sub>  | Benzyl | 7.164  |
| 15      | -H                | Benzyl | 6.270  |
| 16      | -Cl               | Benzyl | 8.046  |
| 17      | -F                | Benzyl | 6.729  |
| 18      | -CF <sub>3</sub>  | Benzyl | 9.074  |

Supplemental Table S2: LogP calculation for all first generation modified TPP<sup>+</sup> compounds

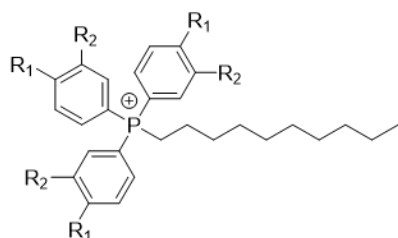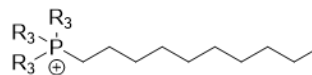

| Sr. No. | R <sub>1</sub>       | R <sub>2</sub>    | Hückel charge | Sr. No. | R <sub>3</sub> | Hückel charge |
|---------|----------------------|-------------------|---------------|---------|----------------|---------------|
|         | Electron Donating    |                   |               | 5       | Phenyl         | 0.326         |
| 1       | -OCH <sub>3</sub>    | -H                | 0.299         | 6       | 1-Naphthyl     | 0.363         |
| 2       | -H                   | -OCH <sub>3</sub> | 0.324         |         |                |               |
|         | Electron Withdrawing |                   |               |         |                |               |
| 3       | -F                   | -H                | 0.328         |         |                |               |
| 4       | -H                   | -F                | 0.325         |         |                |               |

Supplemental Table S3: Hückel charge calculations for charge density on the phosphorus atom for sets of modified TPP-decyl compounds which attempt to vary either Hückel charge or lipophilicity, while keeping the other variable constant.

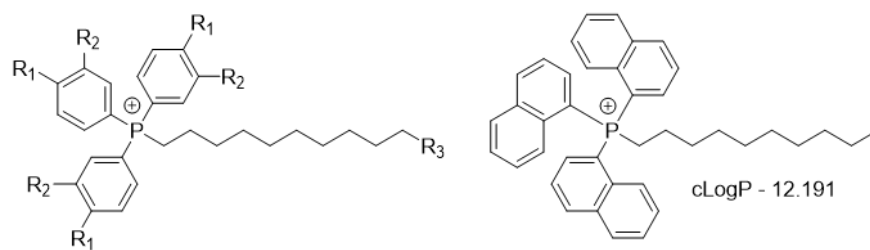

| Sr. No. | R <sub>1</sub>    | R <sub>2</sub>    | R <sub>3</sub>   | cLogP  |
|---------|-------------------|-------------------|------------------|--------|
| 1       | -H                | -H                | -H               | 8.531  |
| 2       | -OCH <sub>3</sub> | -H                | -H               | 8.399  |
| 3       | -H                | -OCH <sub>3</sub> | -H               | 8.510  |
| 4       | -F                | -H                | -H               | 8.990  |
| 5       | -H                | -F                | -H               | 9.101  |
| 6       | -OCH <sub>3</sub> | -H                | -NH <sub>2</sub> | 6.970  |
| 7       | -H                | -H                | -NH <sub>2</sub> | 7.102  |
| 8       | -CF <sub>3</sub>  | -H                | -NH <sub>2</sub> | 9.906  |
| 9       | -OCH <sub>3</sub> | -H                | -COOH            | 7.479  |
| 10      | -H                | -H                | -COOH            | 7.611  |
| 11      | -CF <sub>3</sub>  | -H                | -COOH            | 10.415 |

Supplemental Table S4: LogP calculation for second generation TPP<sup>+</sup> compounds.

Supplementary Figures:

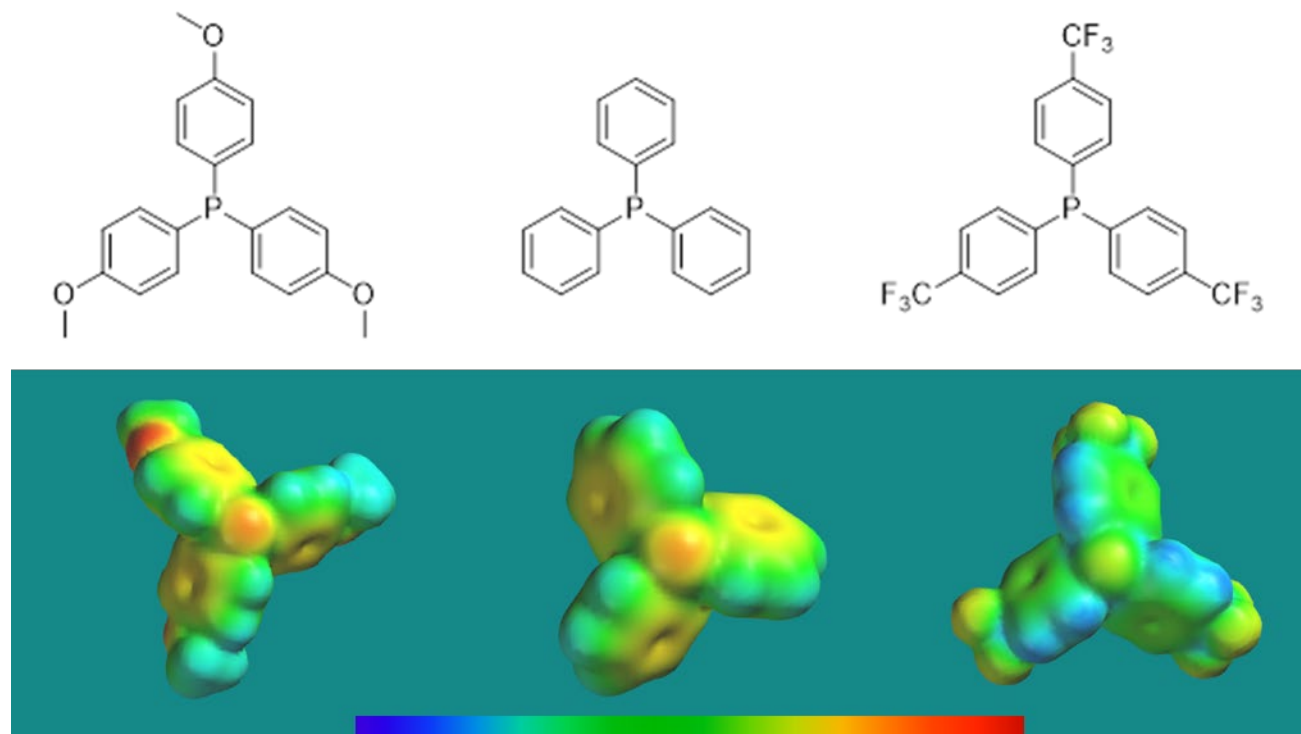

Supplemental Figure S1: Electrostatic potential map of triphenylphosphine with para-methoxy substitution (left), no substitution (center) and para-trifluoromethyl substitution (right). As the methoxy groups donate electrons through resonance effect, they increase the electron density on the phosphorus, thereby making the phosphorus atom electron rich, as shown by increase in the red color over triphenylphosphine. On the other hand, the trifluoromethyl groups withdraw electrons from the phosphorus, making it less electron rich (less red) than the unsubstituted triphenylphosphine.



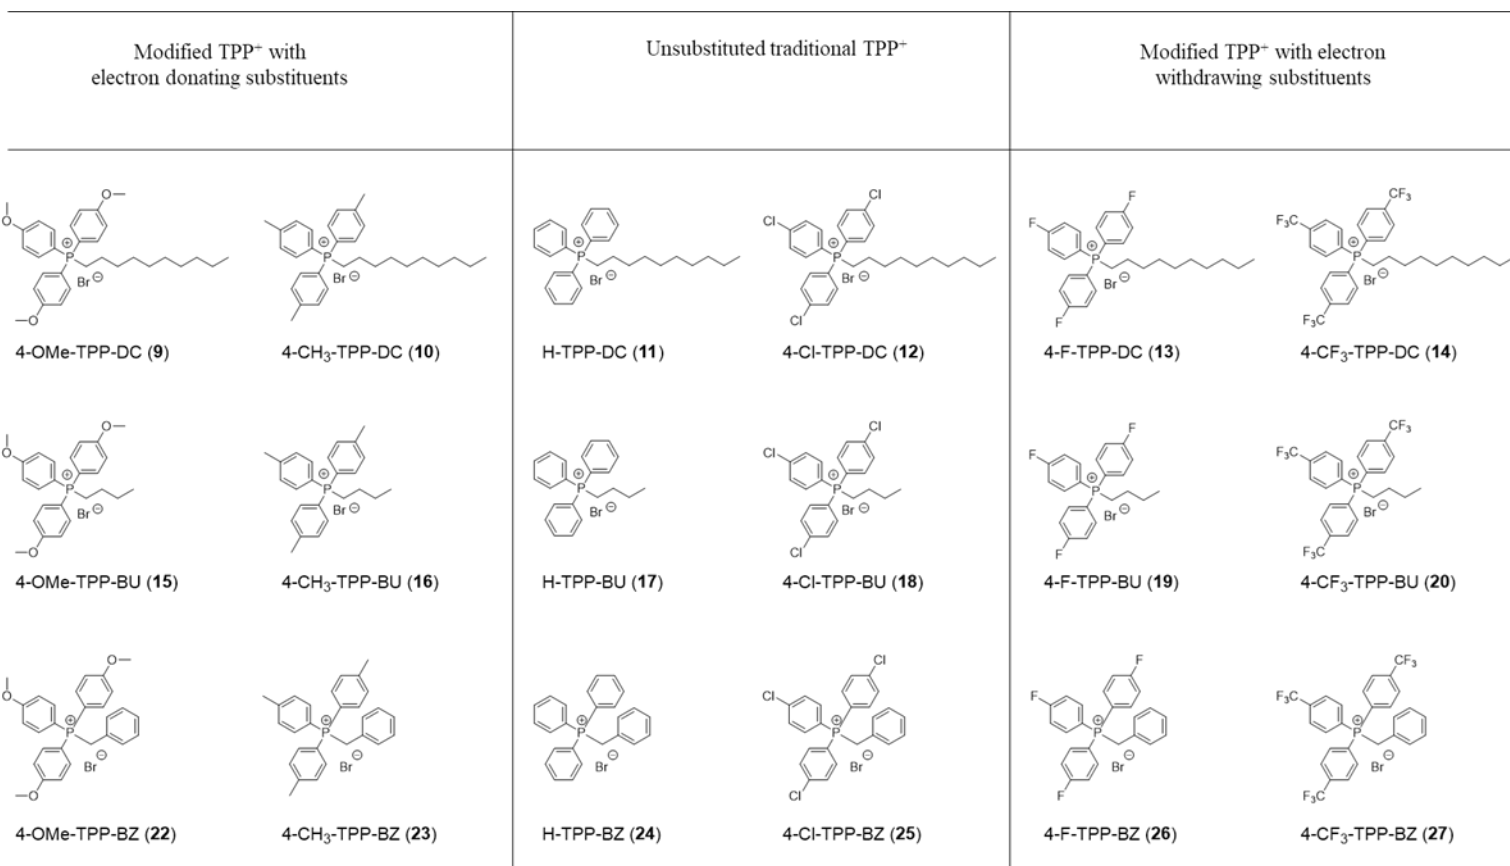

Supplemental Figure S2: Panel of first-generation aryl modified TPP<sup>+</sup> conjugates with the decyl, butyl and benzyl linker chains.

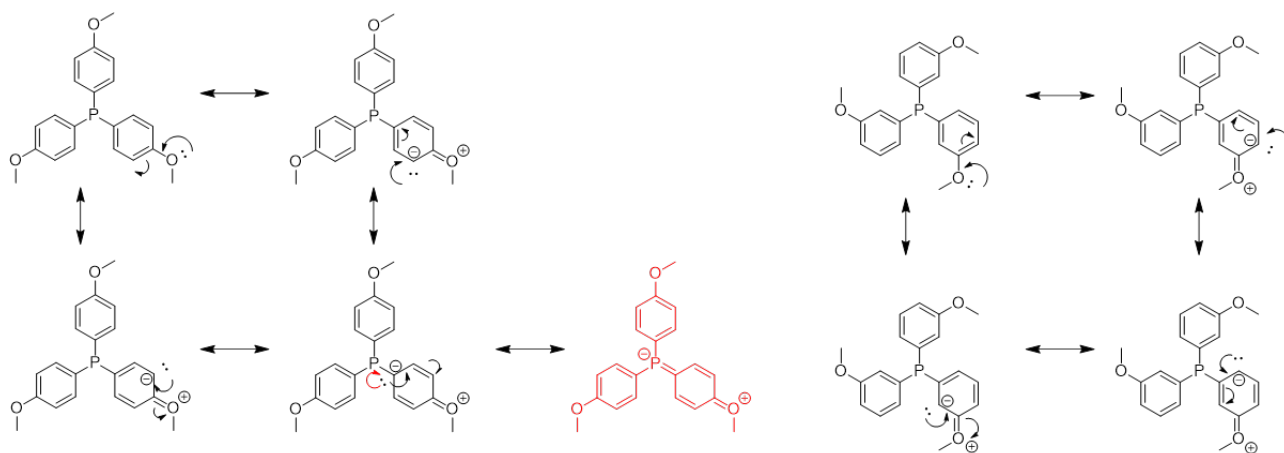

Para-methoxy substitution

Meta-methoxy substitution

Supplemental Figure S3: Resonance of a para substituent and meta substituent and how it affects the charge density of the phosphorus atom in triphenylphosphine.

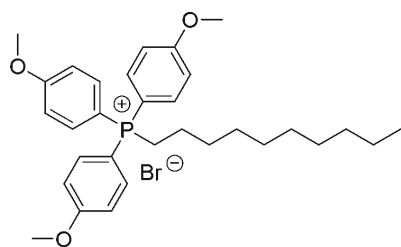

4-OMe-TPP-DC (**9**)

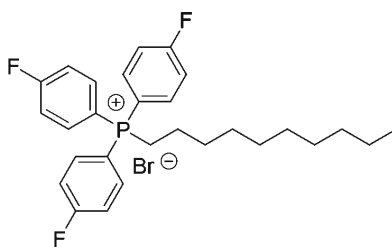

4-F-TPP-DC (**13**)

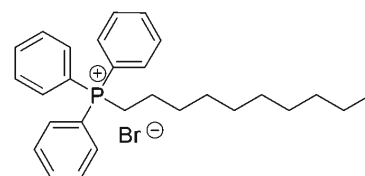

H-TPP-DC (**11**)

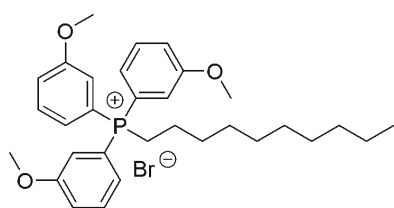

3-OMe-TPP-DC (**30**)

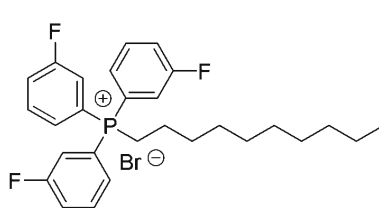

3-F-TPP-DC (**31**)

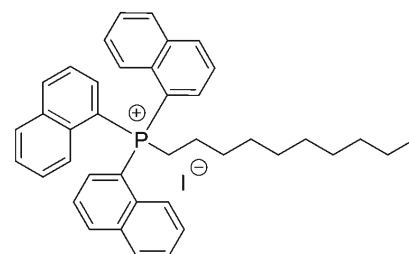

Tris(1-Naphthyl)-P-DC (**33**)

Supplemental Figure S4: The second-generation aryl modified TPP<sup>+</sup> conjugates. Compounds **30**, **31**, **33** were designed to alter either Hückel Charge or Lipophilicity as one variable while keeping the other variable constant as compared to cognate first-generation analogs, compounds **9**, **13** and **11** respectively.

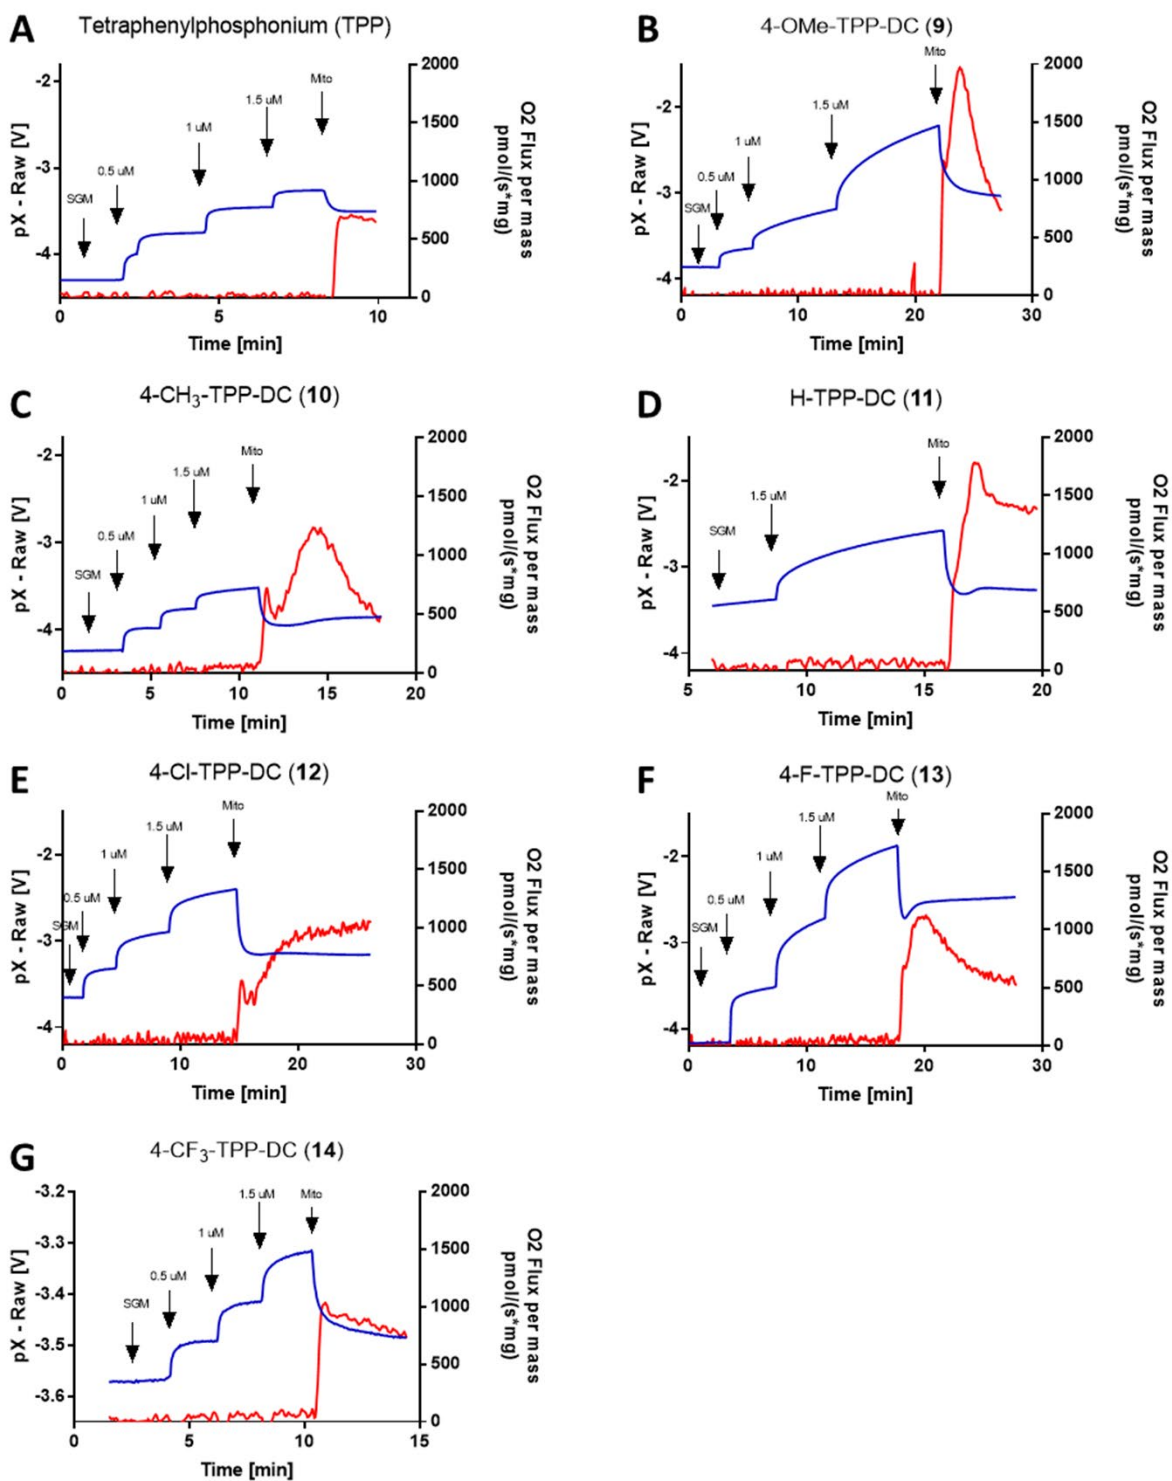

Supplemental Figure S5: Mitochondrial accumulation of first-generation aryl modified TPP<sup>+</sup>-decyl analogs assessed by TPP<sup>+</sup> ion-selective electrode measurements. Mitochondrial substrate combination (SGM) was added to the chamber first. Then TPP<sup>+</sup> electrode response (blue trace; plotted on left Y-axis) was calibrated with 3 × 0.5 μM additions of the investigated compound, followed by addition of mouse liver mitochondria

(mito) (0.1 mg/mL) and the experiment terminated when steady state reading was achieved. Corresponding oxygen consumption per unit mass (red trace; plotted on right Y-axis) was recorded with Clark-type oxygen electrode. The compounds tested were (A) tetraphenylphosphonium chloride (TPP); (B) 4-OMe-TPP-DC (**9**); (C) 4-CH<sub>3</sub>-TPP-DC (**10**); (D) H-TPP-DC (**11**); (E) 4-Cl-TPP-DC (**12**); (F) 4-F-TPP-DC (**13**); (G) 4-CF<sub>3</sub>-TPP-DC (**14**).

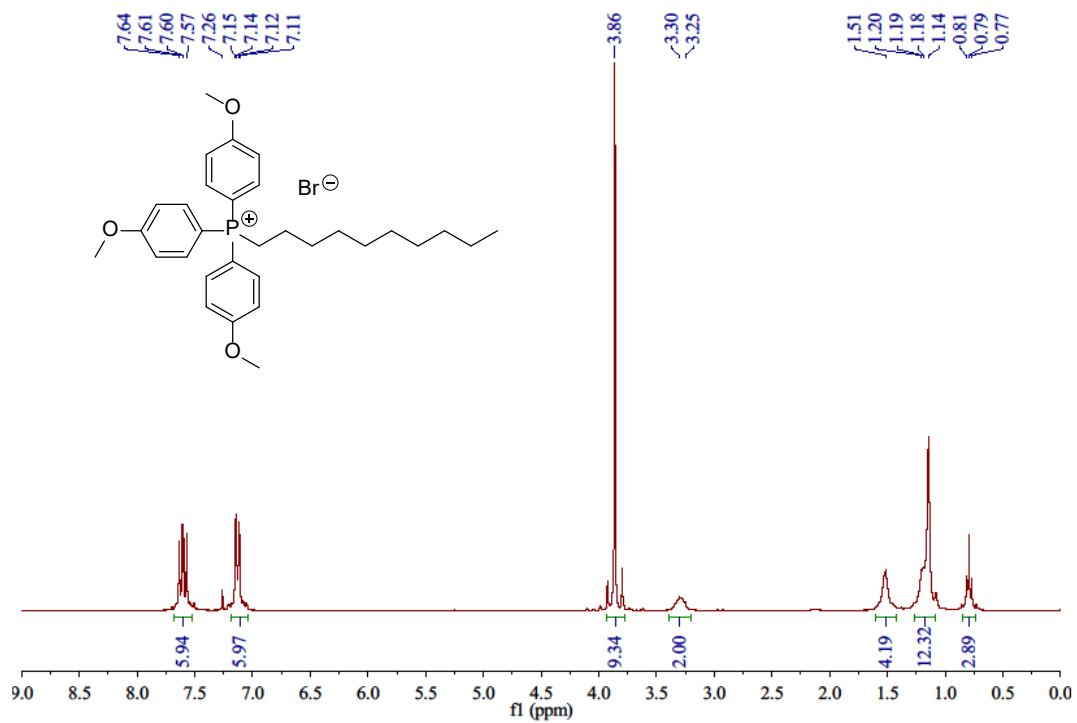

Supplemental Figure S6: <sup>1</sup>H NMR of 4-OMe-TPP-DC (9)

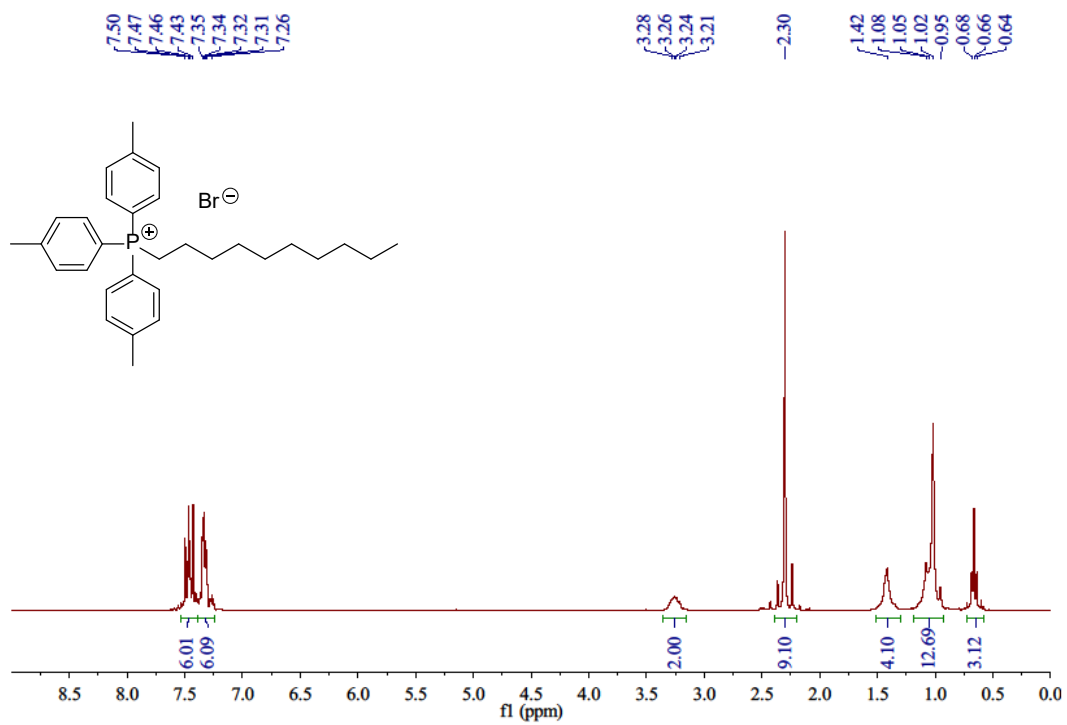

Supplemental Figure S7: <sup>1</sup>H NMR of 4-CH<sub>3</sub>-TPP-DC (10)

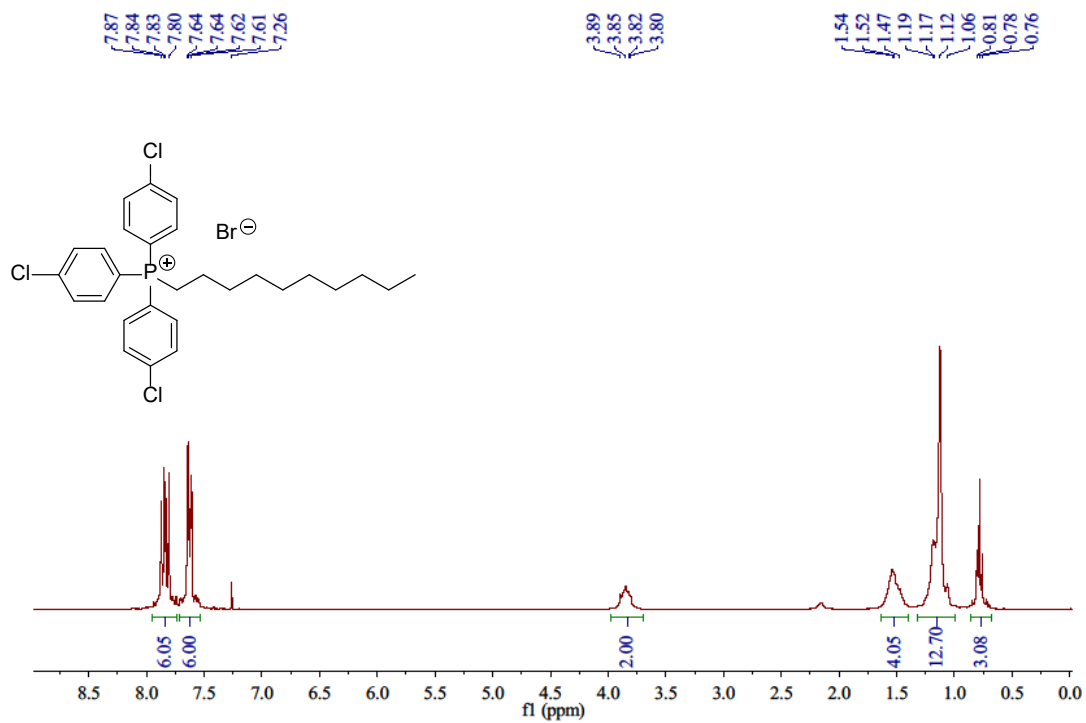

Supplemental Figure S8: <sup>1</sup>H NMR of 4-Cl-TPP-DC (**12**)

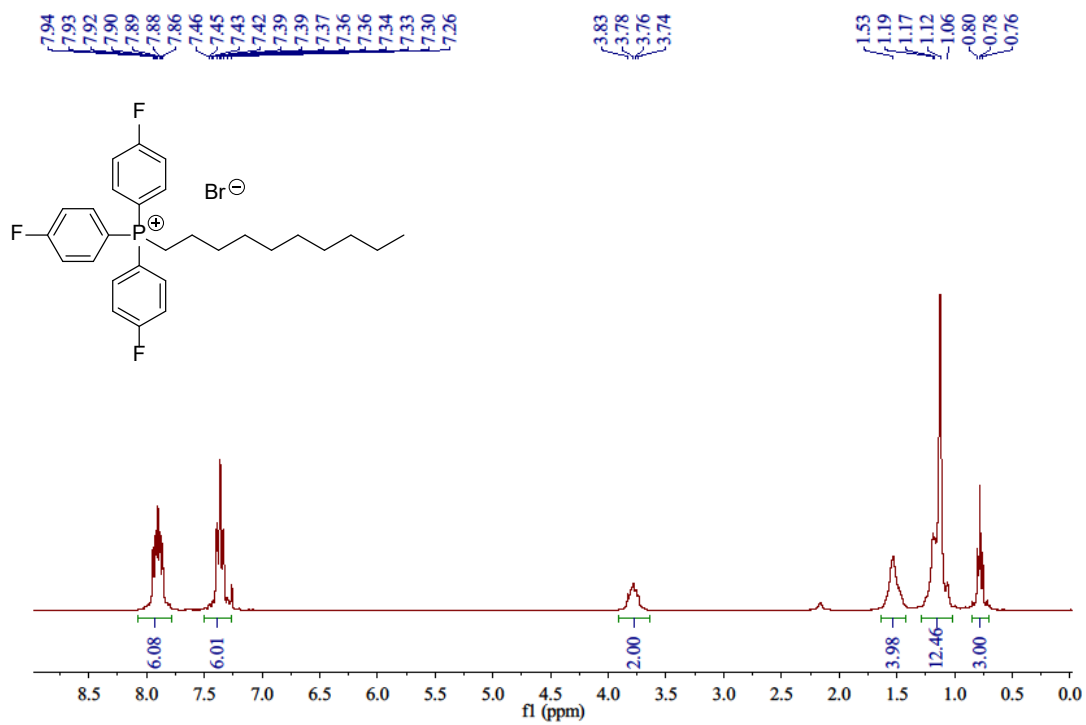

Supplemental Figure S9: <sup>1</sup>H NMR of 4-F-TPP-DC (**13**)

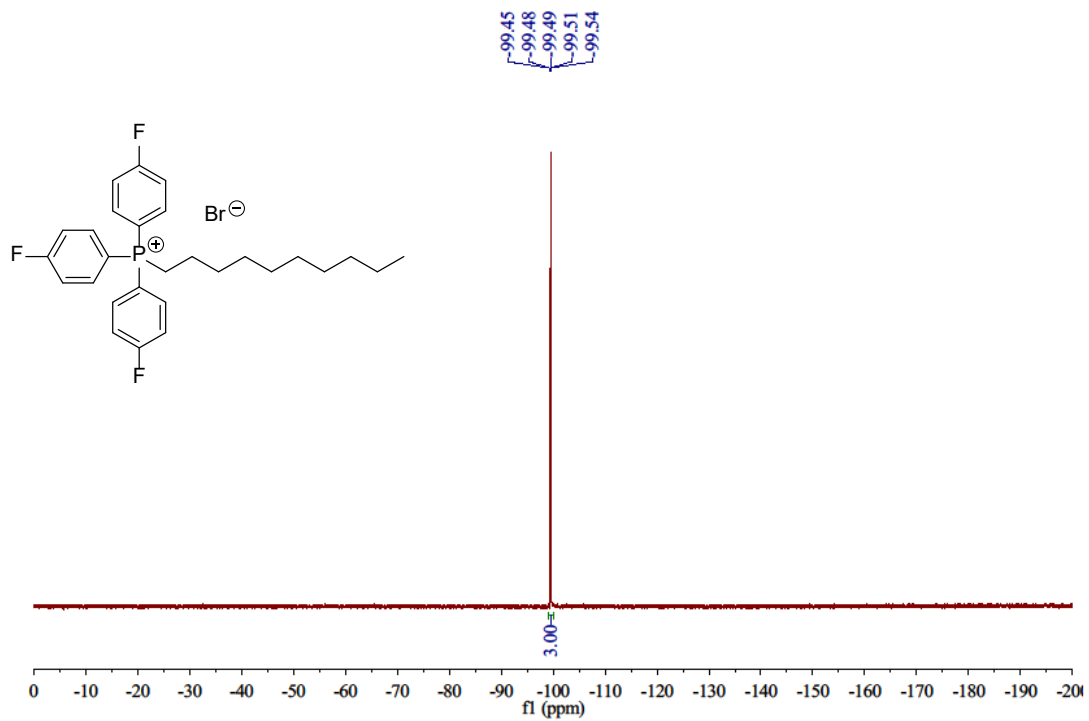

Supplemental Figure S10:  $^{19}\text{F}$  NMR of 4-F-TPP-DC (13)

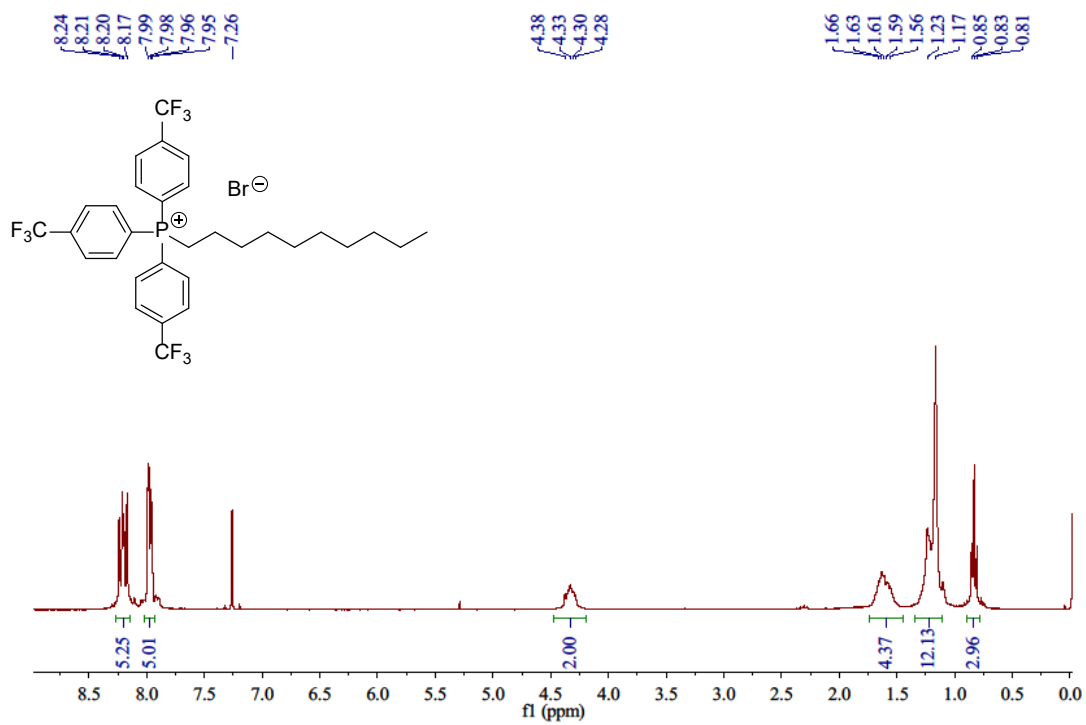

Supplemental Figure S11:  $^1\text{H}$  NMR of 4-CF<sub>3</sub>-TPP-DC (14)



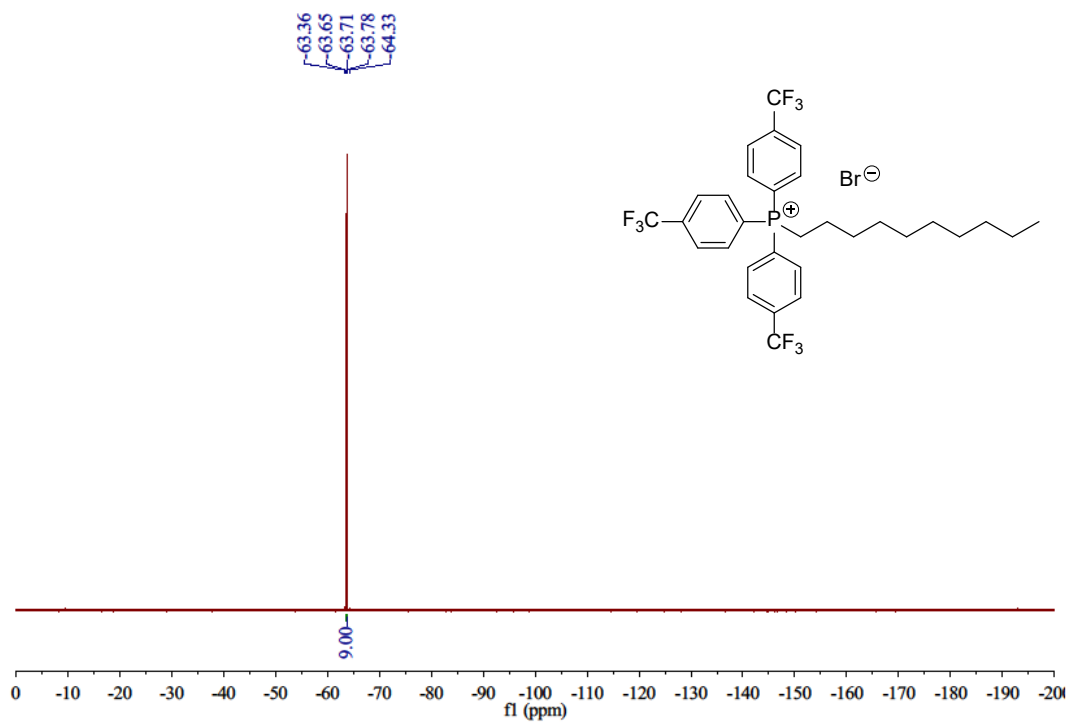

Supplemental Figure S12: <sup>19</sup>F NMR of 4- CF<sub>3</sub>-TPP-DC (**14**)

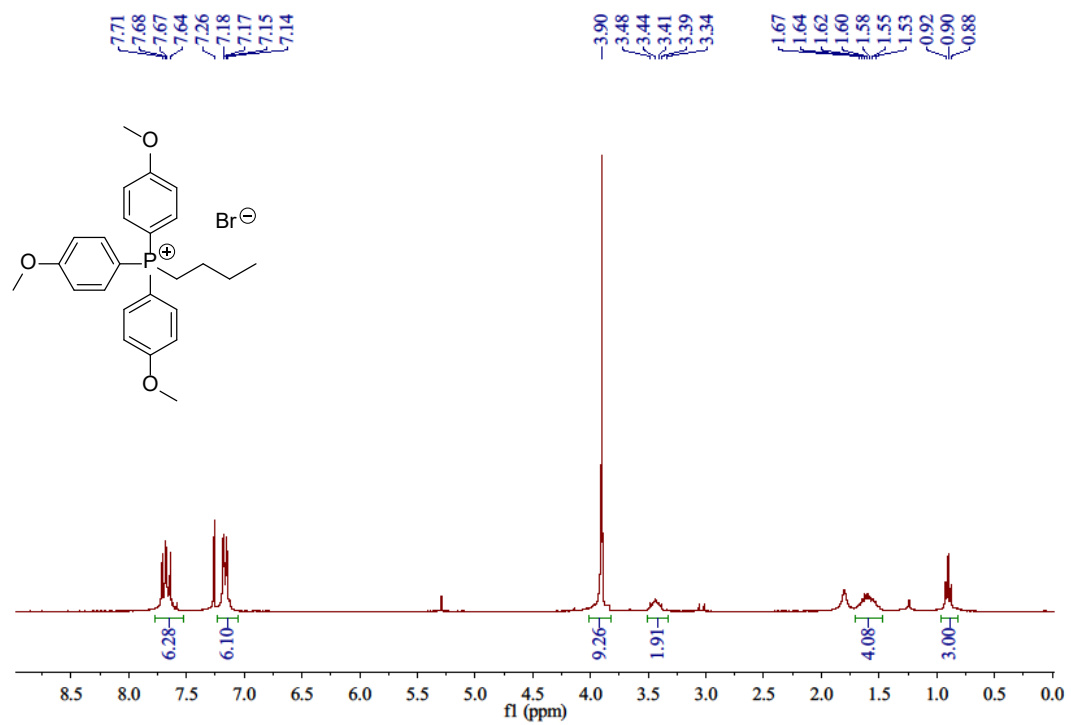

Supplemental Figure S13: <sup>1</sup>H NMR of 4-OMe-TPP-BU (**15**)

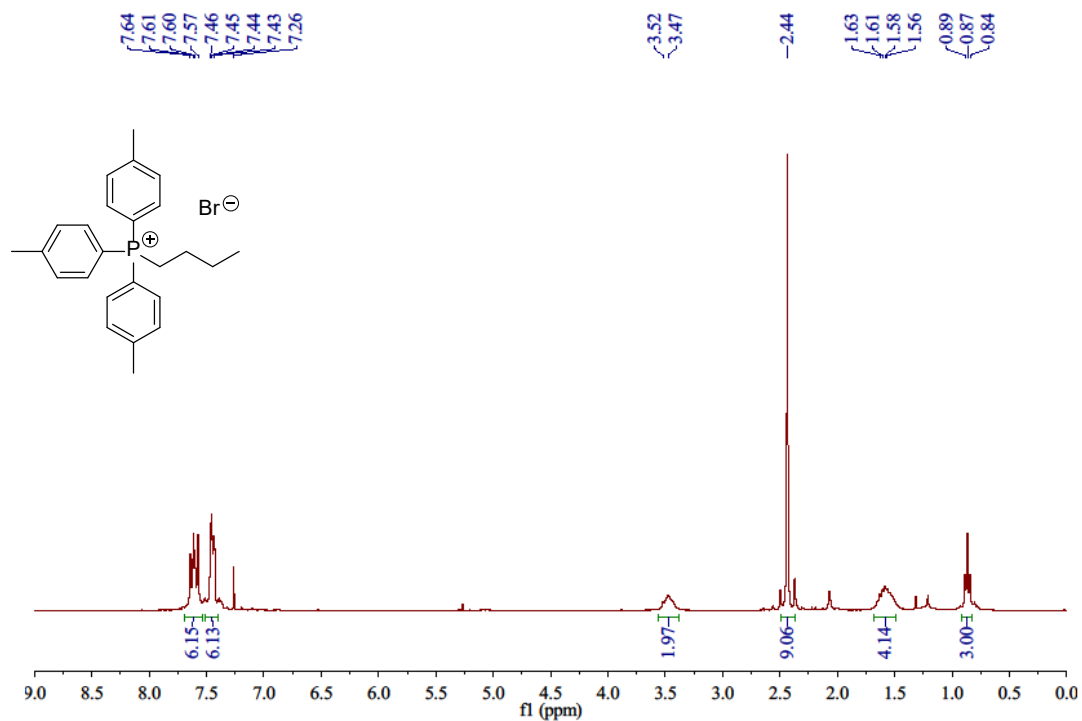

Supplemental Figure S14: <sup>1</sup>H NMR of 4-CH<sub>3</sub>-TPP-BU (16)

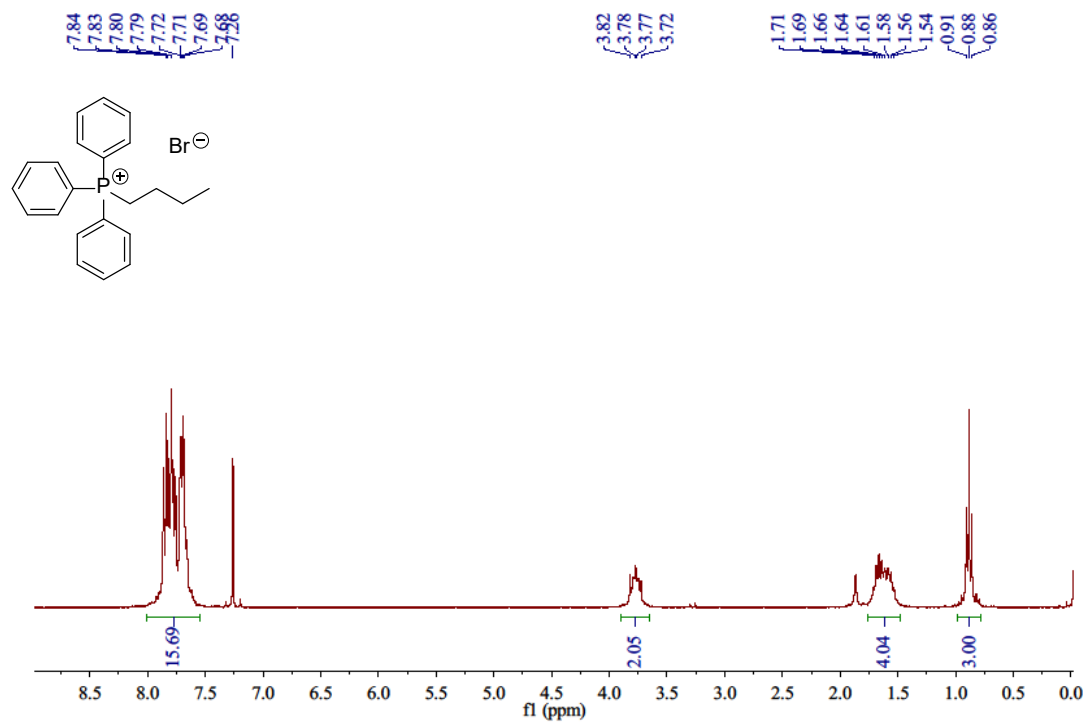

Supplemental Figure S15: <sup>1</sup>H NMR of H-TPP-BU (17)

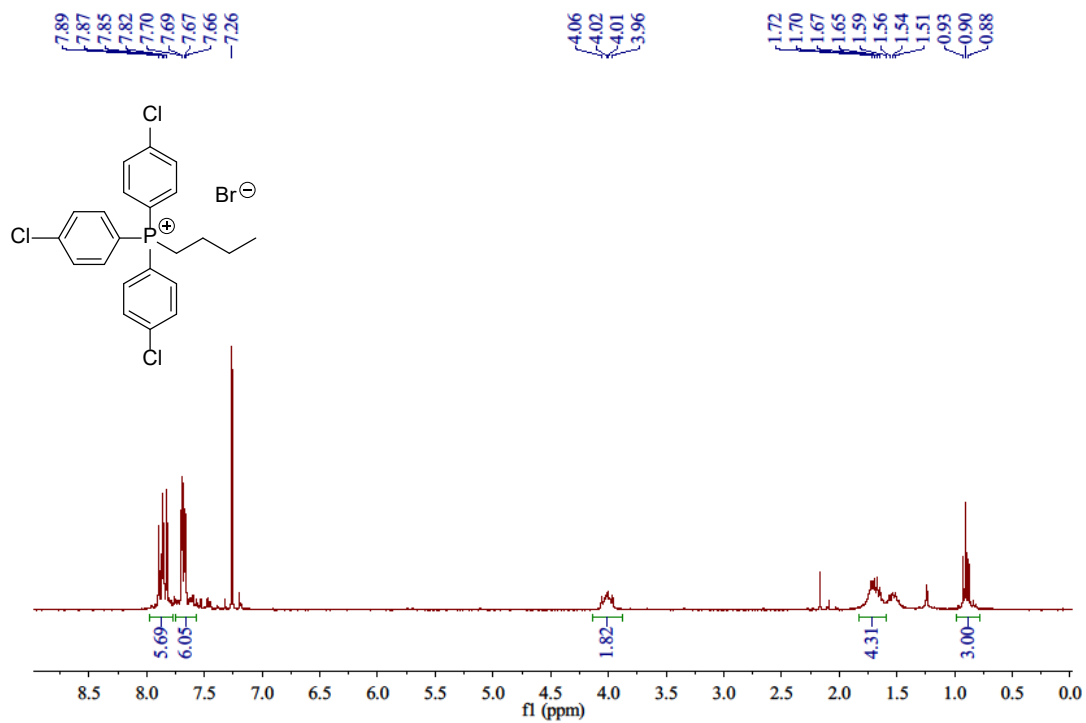

Supplemental Figure S16: <sup>1</sup>H NMR of 4-Cl-TPP-BU (18)

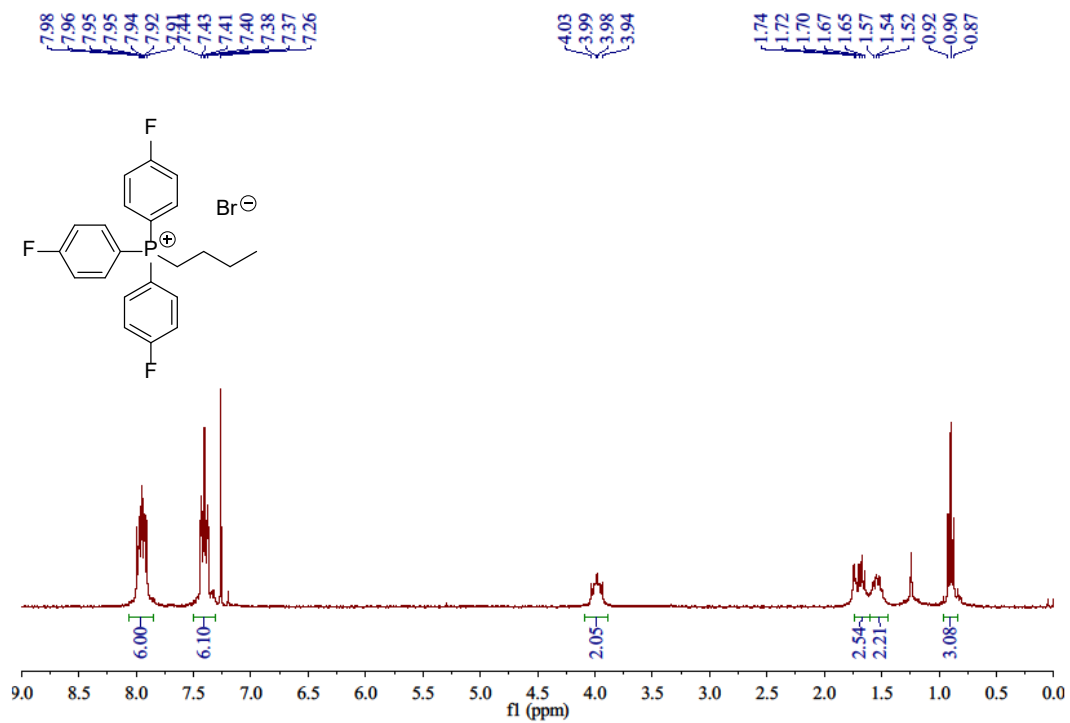

Supplemental Figure S17: <sup>1</sup>H NMR of 4-F-TPP-BU (19)

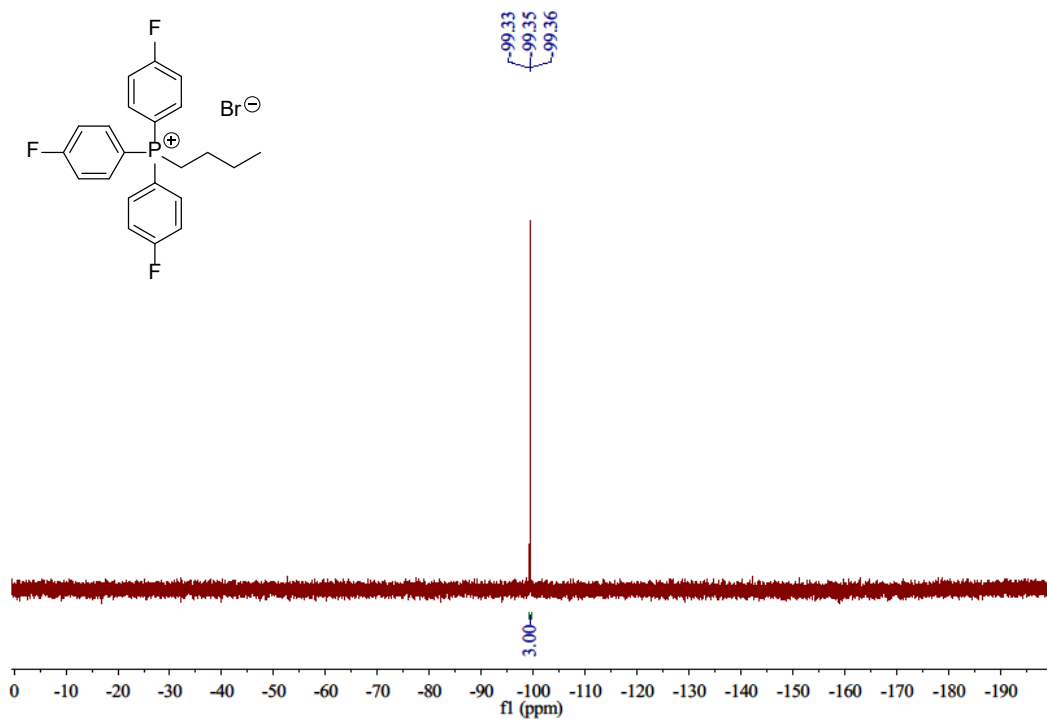

Supplemental Figure S18:  $^{19}\text{F}$  NMR of 4-F-TPP-BU (19)

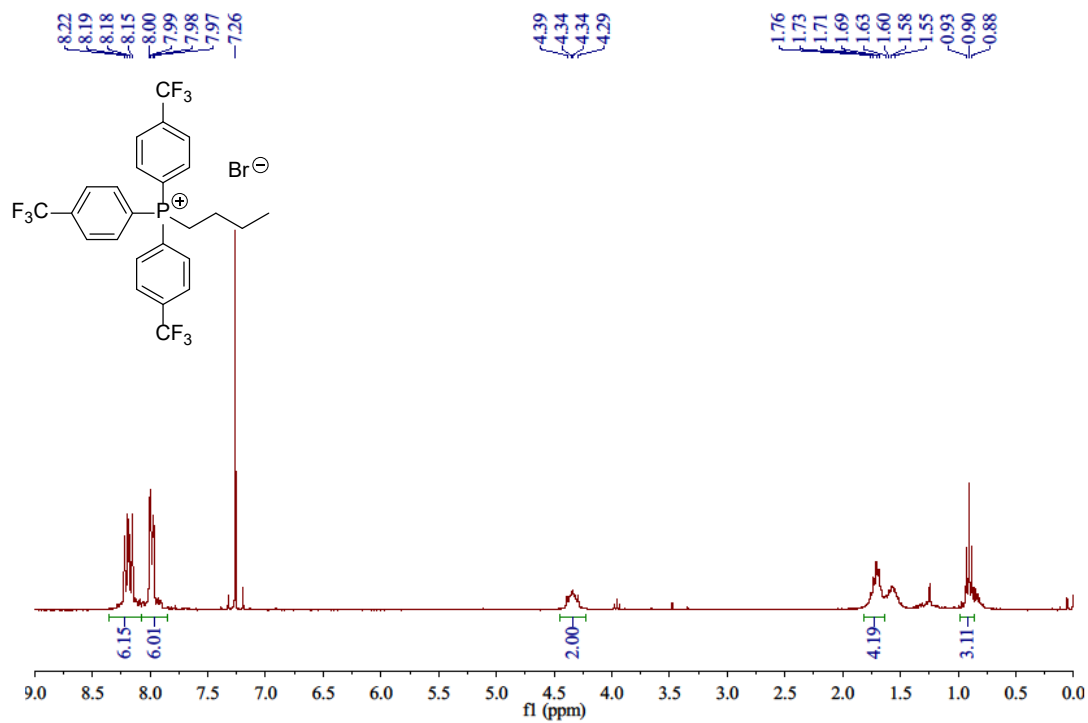

Supplemental Figure S19:  $^1\text{H}$  NMR of 4-CF<sub>3</sub>-TPP-BU (20)

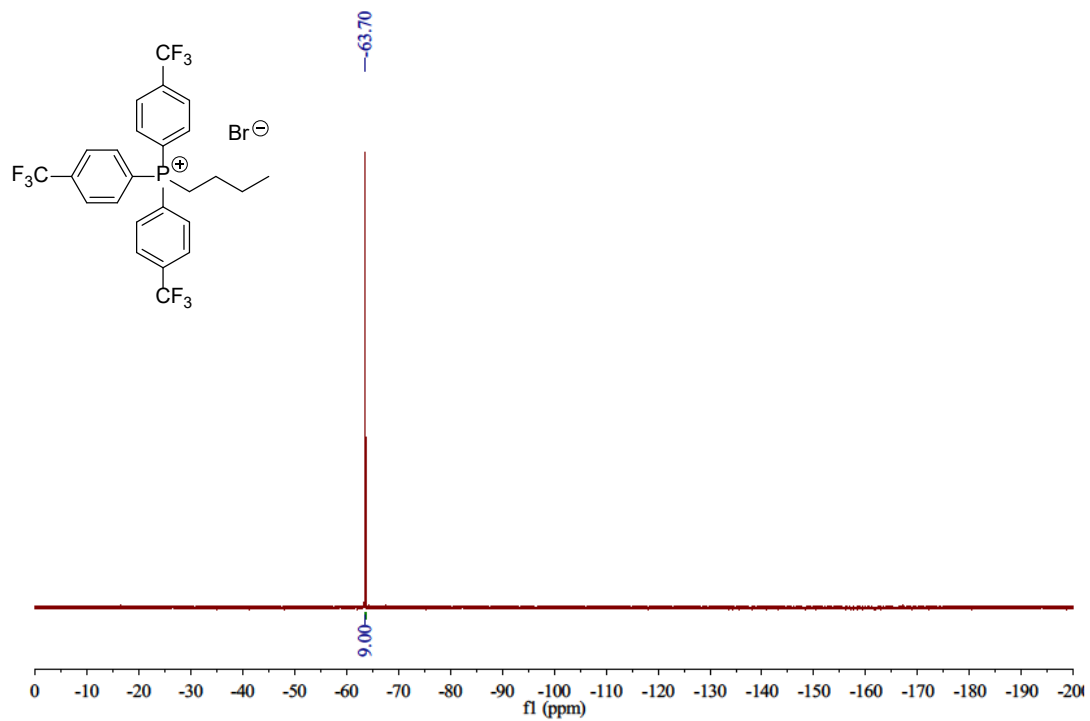

Supplemental Figure S20: <sup>19</sup>F NMR of 4- CF<sub>3</sub>-TPP-BU (20)

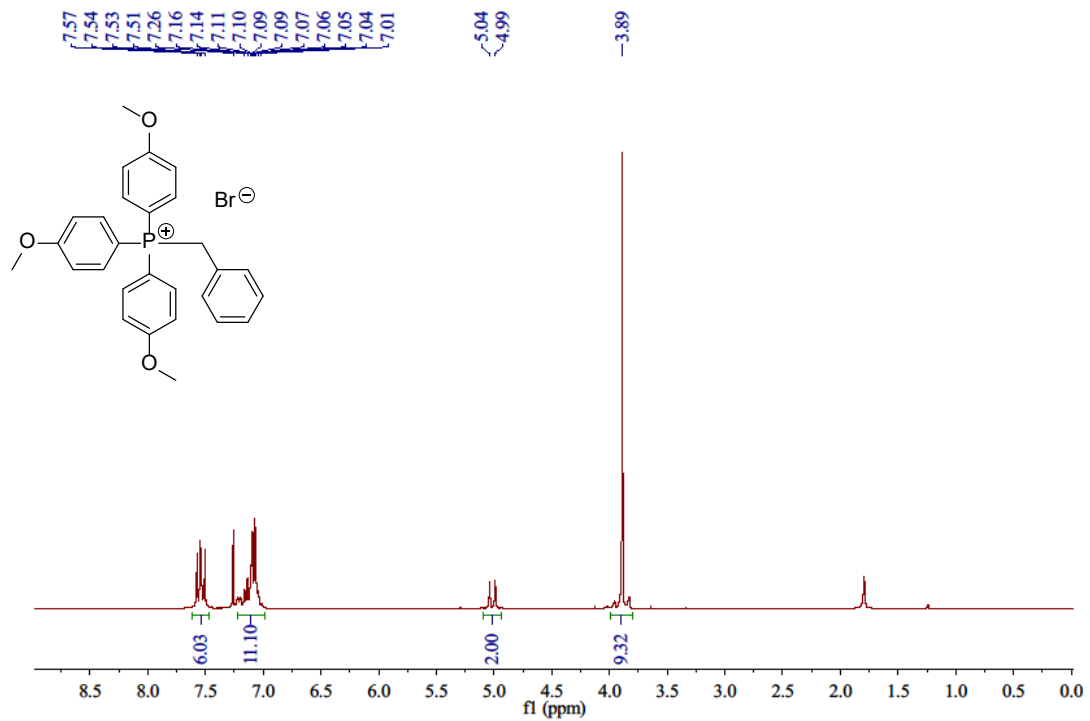

Supplemental Figure S21: <sup>1</sup>H NMR of 4-OMe-TPP-BZ (22)

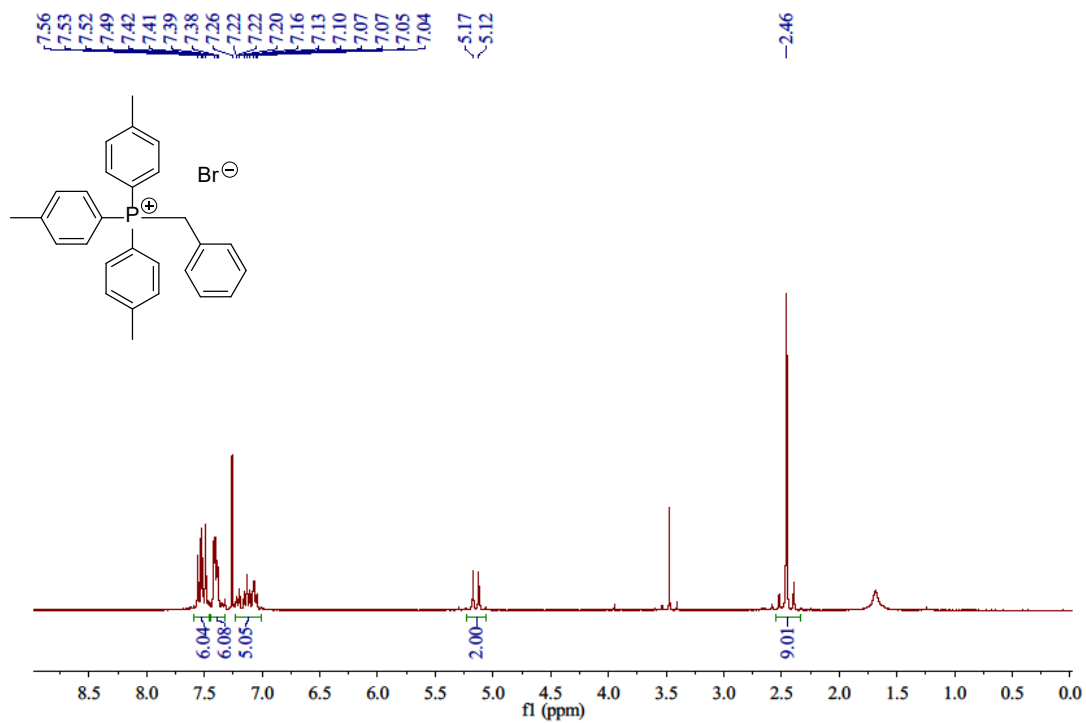

Supplemental Figure S22: <sup>1</sup>H NMR of 4-CH<sub>3</sub>-TPP-BZ (**23**)

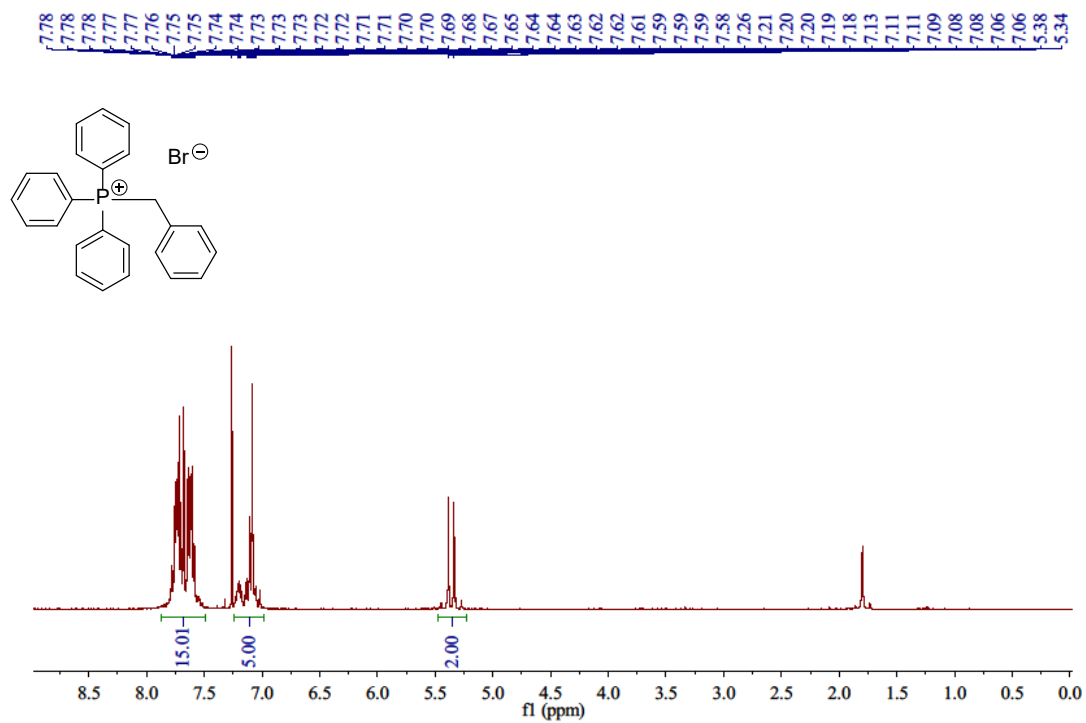

Supplemental Figure S23: <sup>1</sup>H NMR of H-TPP-BZ (**24**)

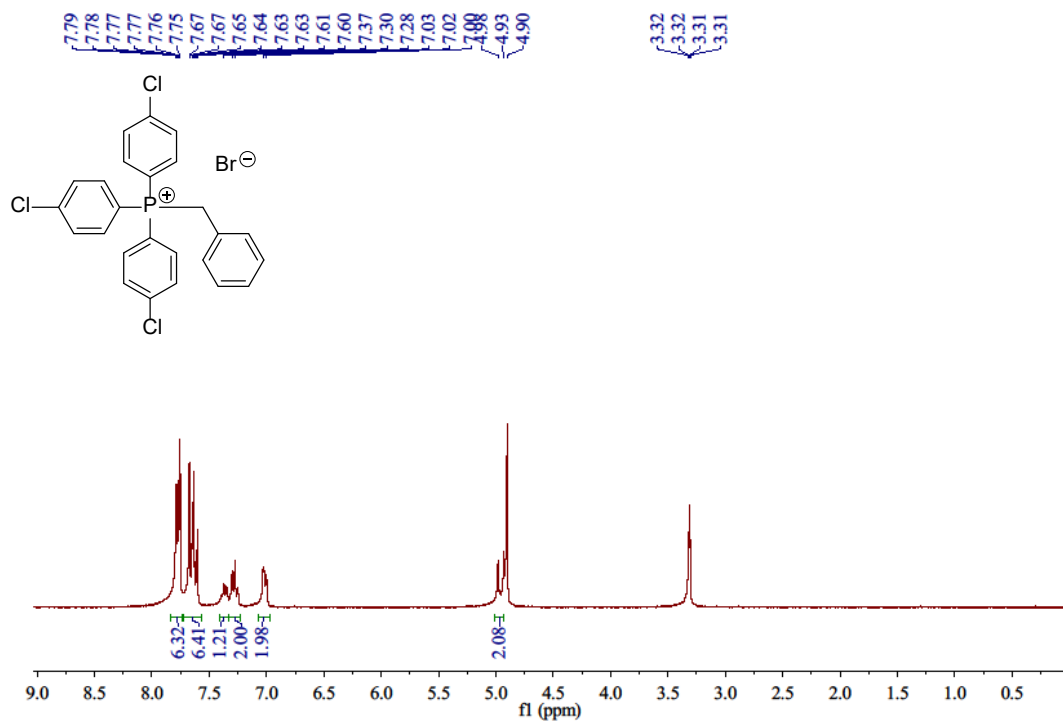

Supplemental Figure S24:  $^1\text{H}$  NMR of 4-Cl-TPP-BZ (25)

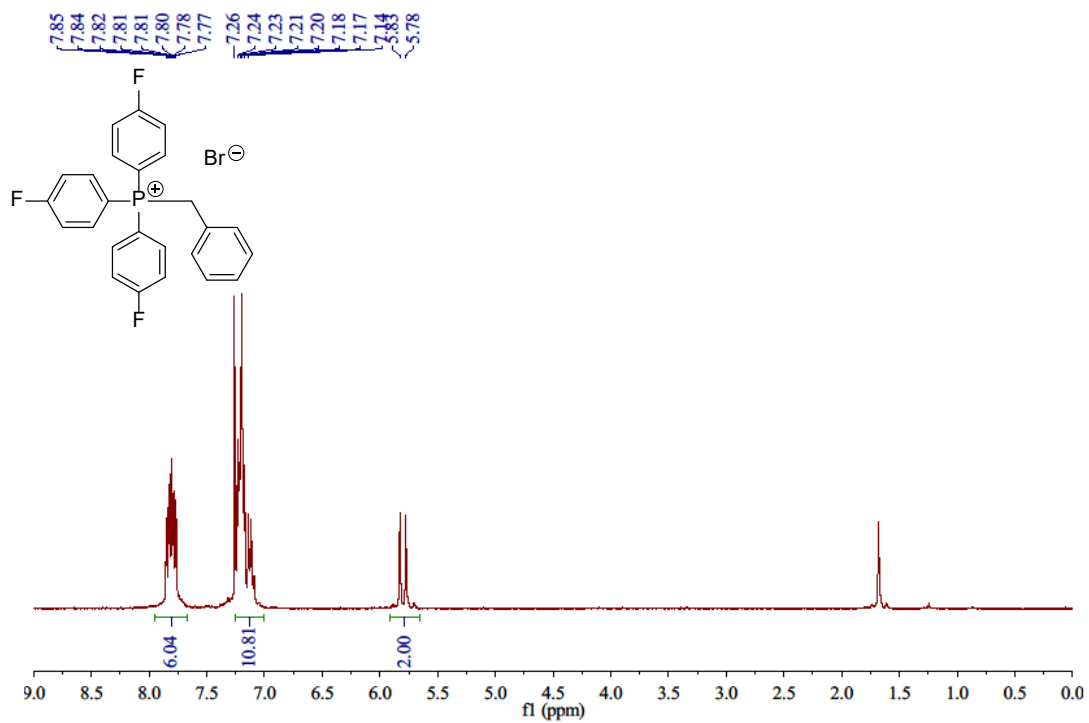

Supplemental Figure S25:  $^1\text{H}$  NMR of 4-F-TPP-BZ (26)

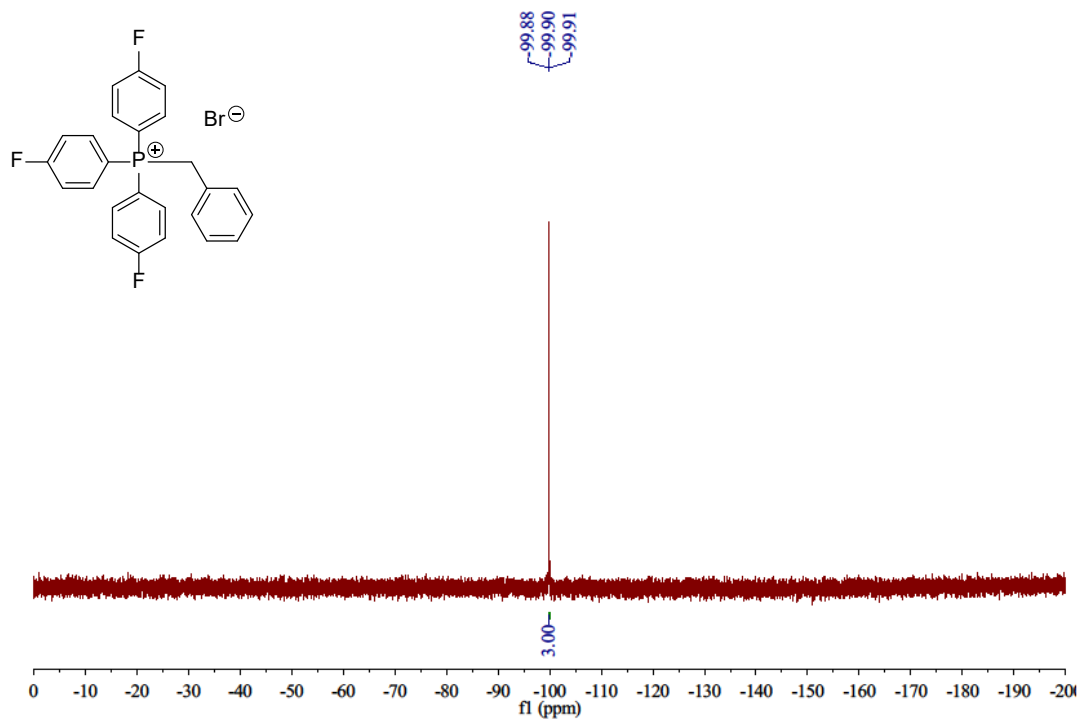

Supplemental Figure S26:  $^{19}\text{F}$  NMR of 4-F-TPP-BZ (26)

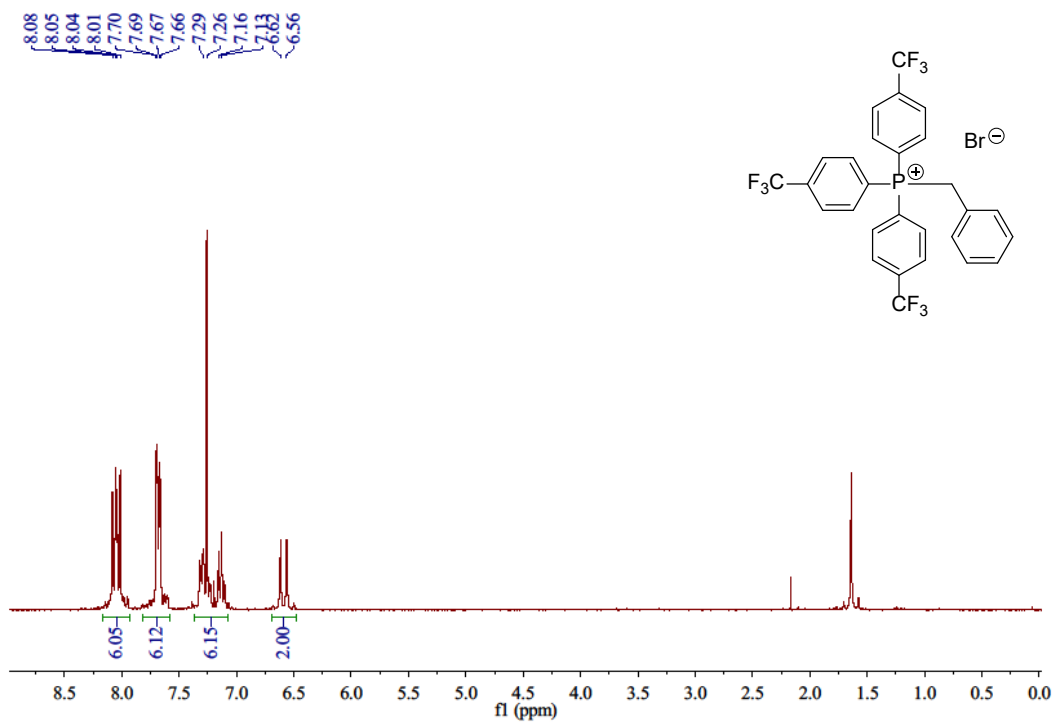

Supplemental Figure S27:  $^1\text{H}$  NMR of 4-CF<sub>3</sub>-TPP-BZ (27)



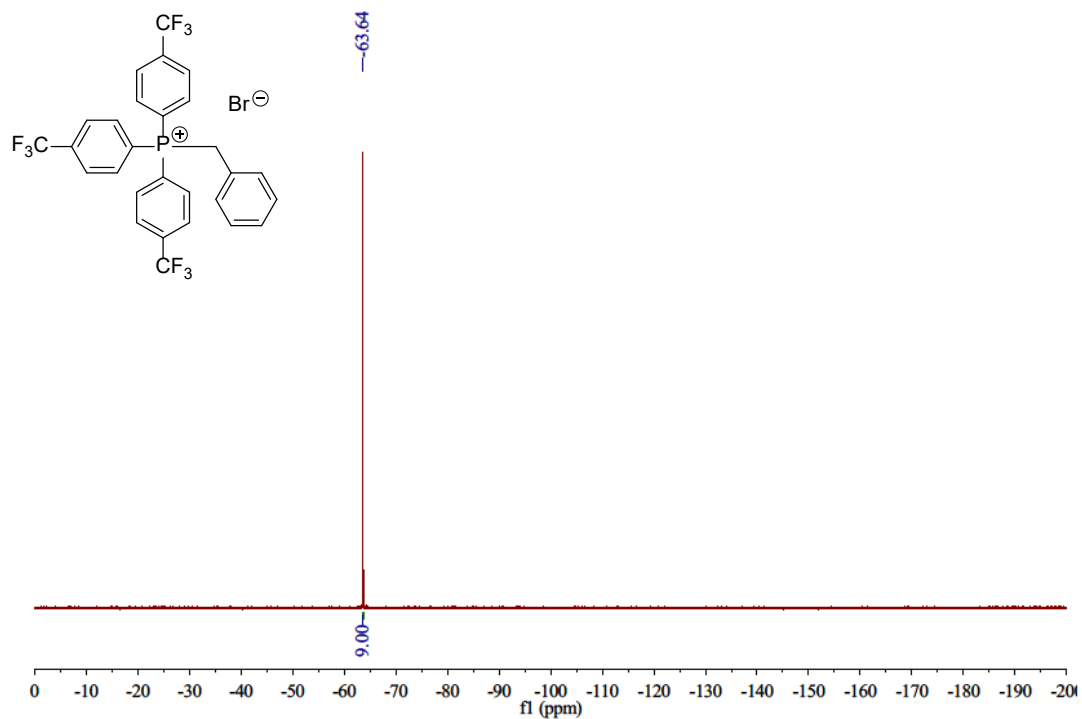

Supplemental Figure S28: <sup>19</sup>F NMR of 4- CF<sub>3</sub>-TPP-BZ (27)

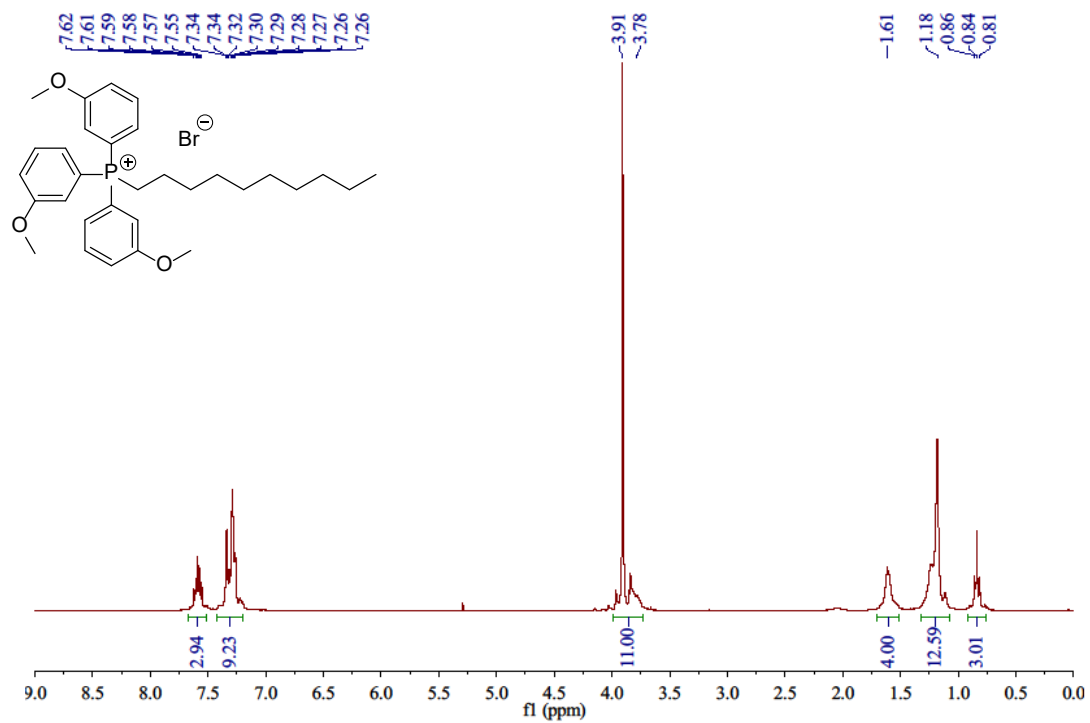

Supplemental Figure S29: <sup>1</sup>H NMR of 3-OMe-TPP-DC (30)

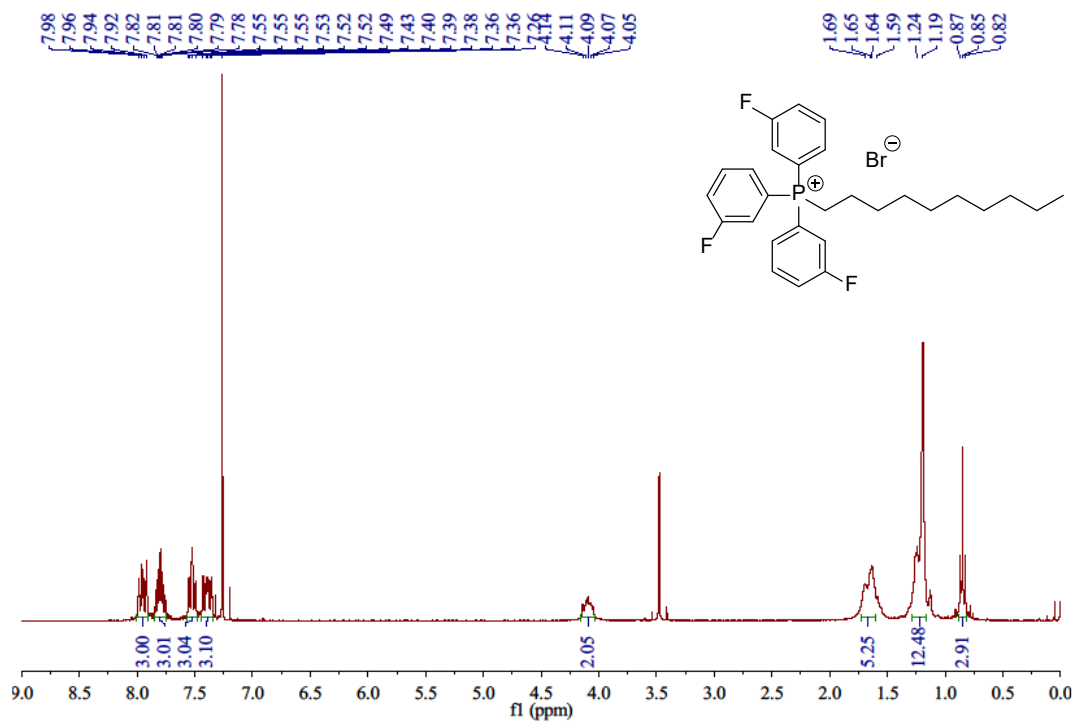

Supplemental Figure S30: <sup>1</sup>H NMR of 3-F-TPP-DC (31)

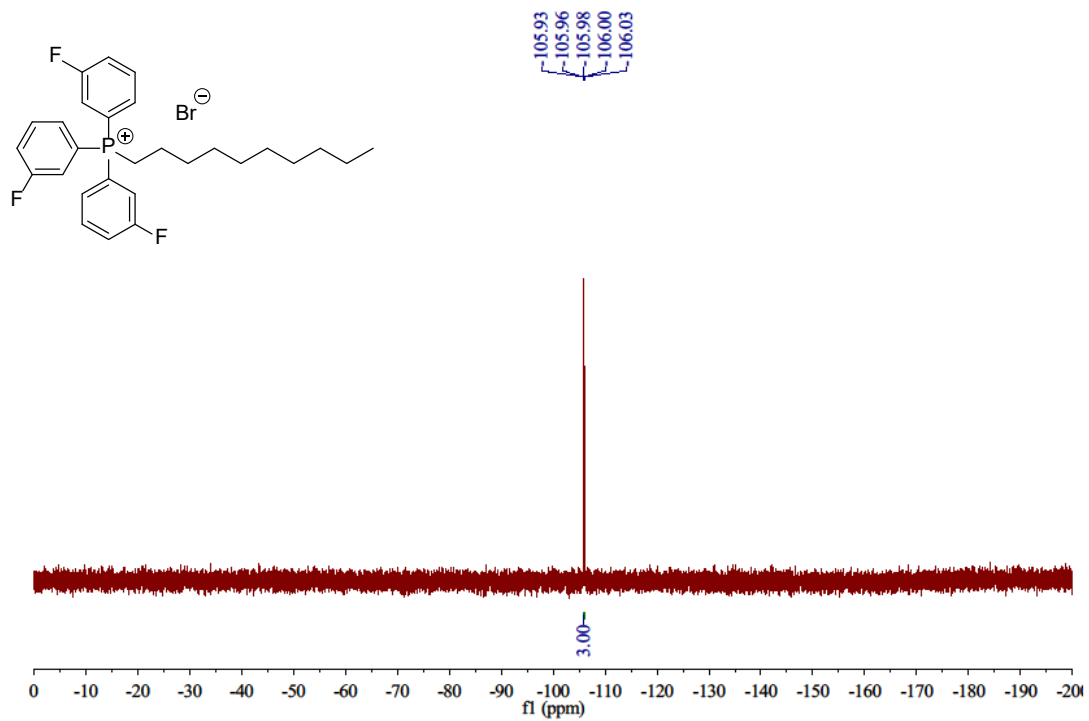

Supplemental Figure S31: <sup>19</sup>F NMR of 3-F-TPP-DC (31)

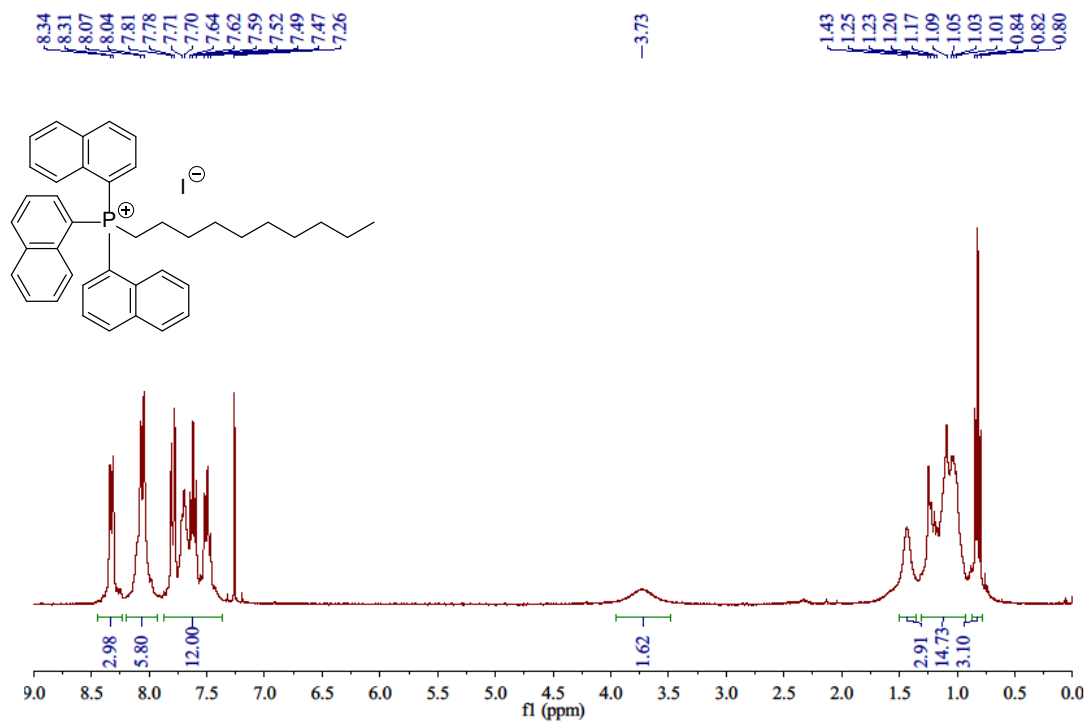

Supplemental Figure S32: <sup>1</sup>H NMR of Tri-Nap-P-DC-I (**33**)

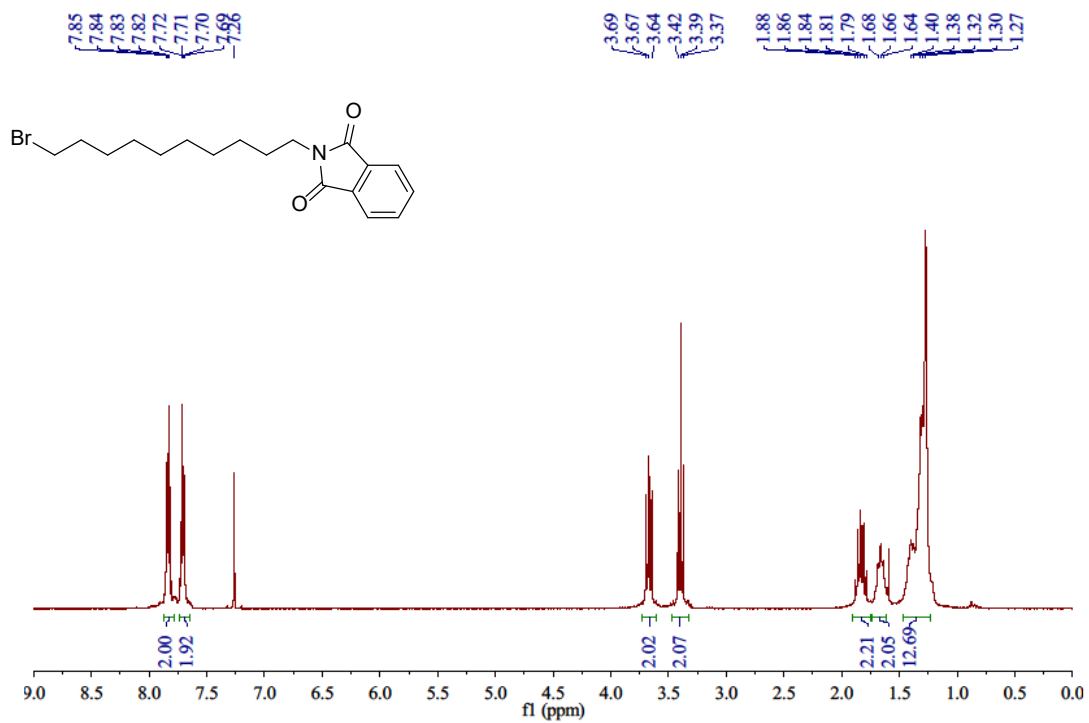

Supplemental Figure S33: <sup>1</sup>H NMR of Br-DC-Phthalimide (**36**)

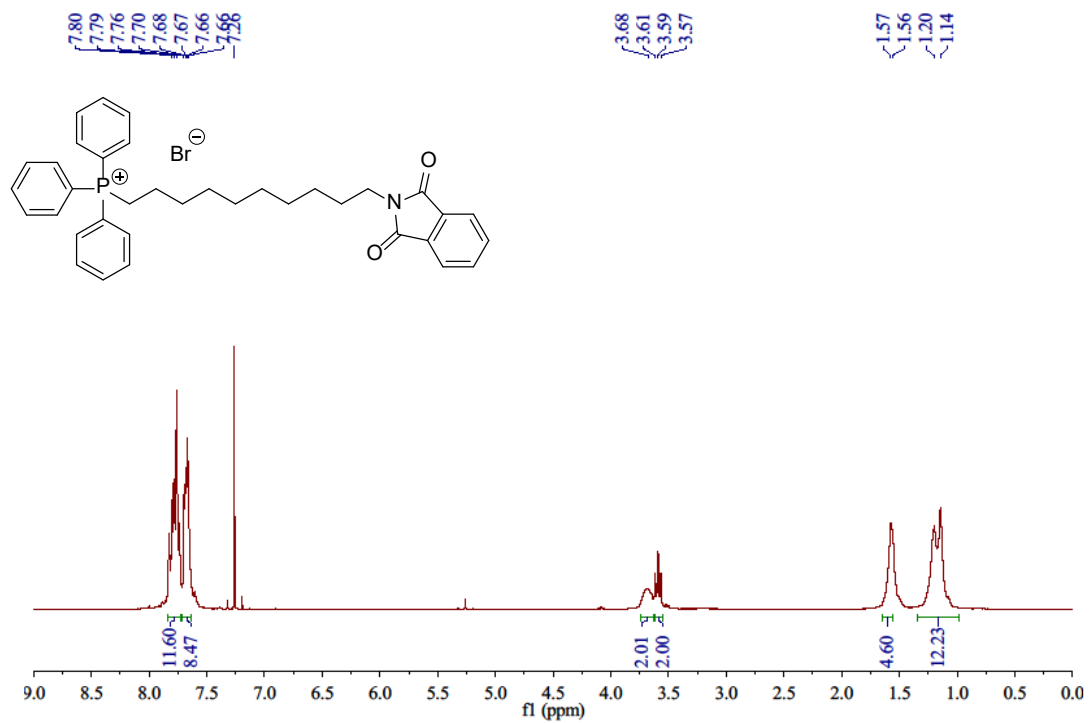

Supplemental Figure S34:  $^1\text{H}$  NMR of H-TPP-DC-Pthalimide (37)

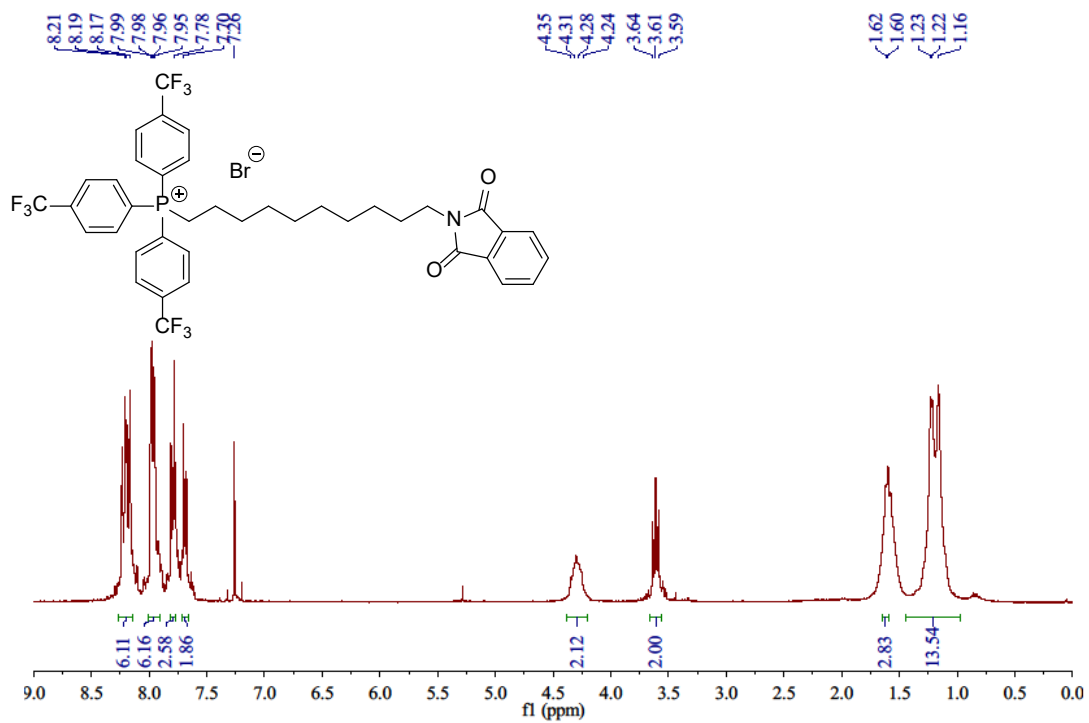

Supplemental Figure S35:  $^1\text{H}$  NMR of 4- $\text{CF}_3$ -TPP-DC-Pthalimide (38)

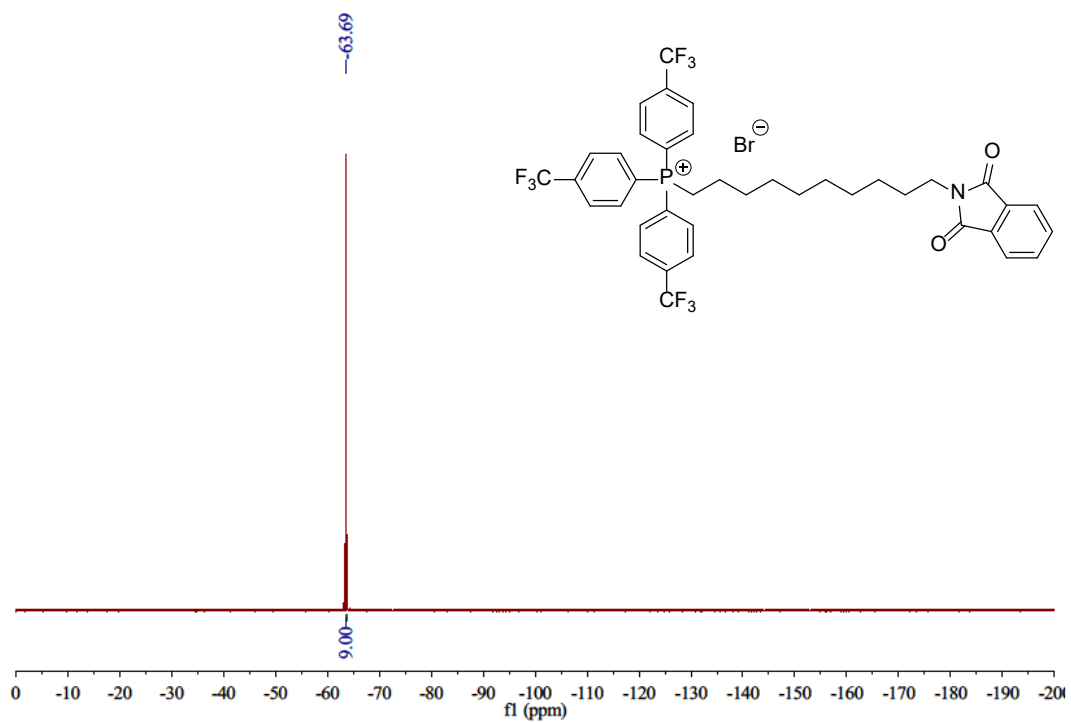

Supplemental Figure S36: <sup>19</sup>F NMR of 4-CF<sub>3</sub>-TPP-DC-Pthalimide (38)

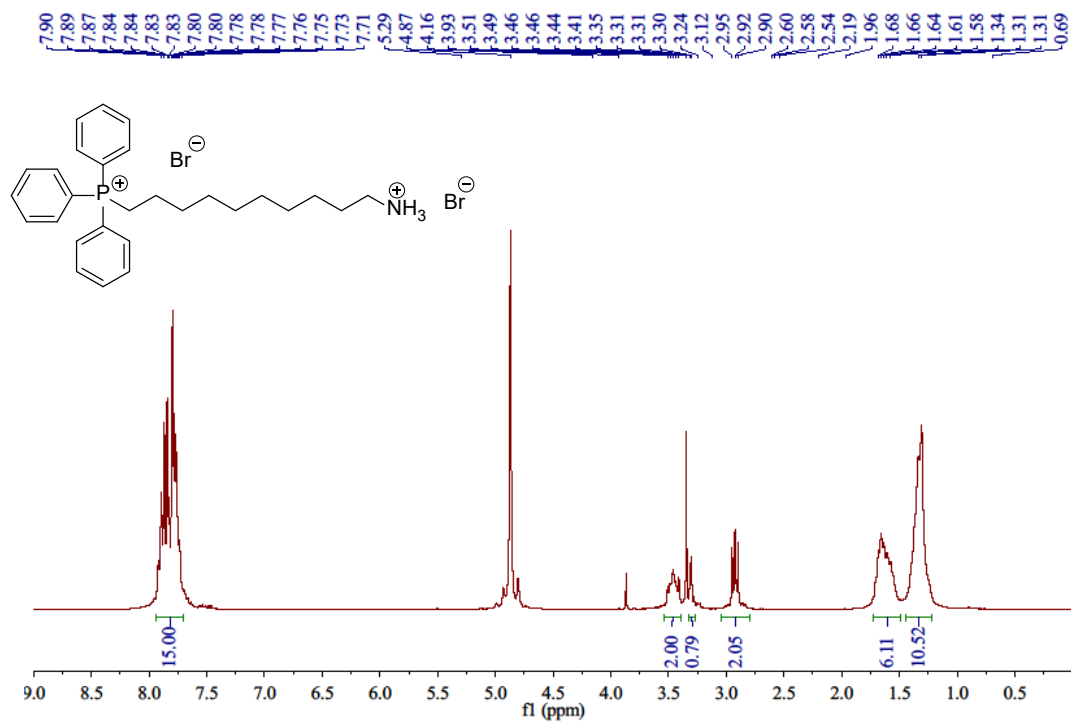

Supplemental Figure S37: <sup>1</sup>H NMR of H-TPP-DC-NH<sub>2</sub> (39)

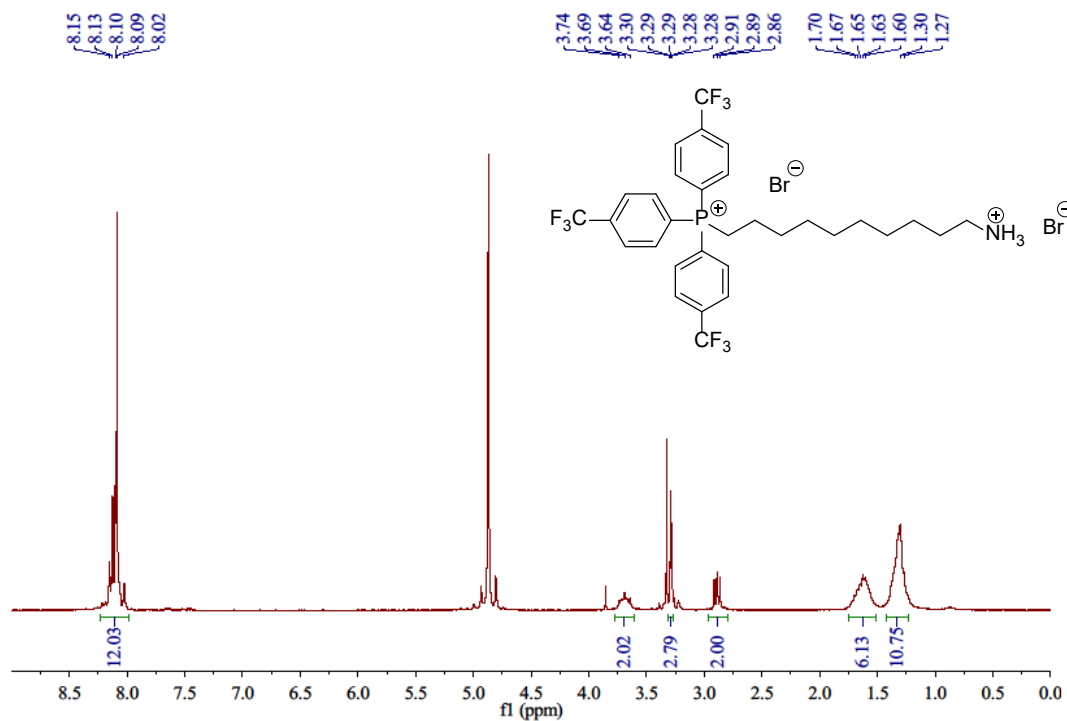

Supplemental Figure S38: <sup>1</sup>H NMR of 4-CF<sub>3</sub>-TPP-DC-NH<sub>2</sub> (40)

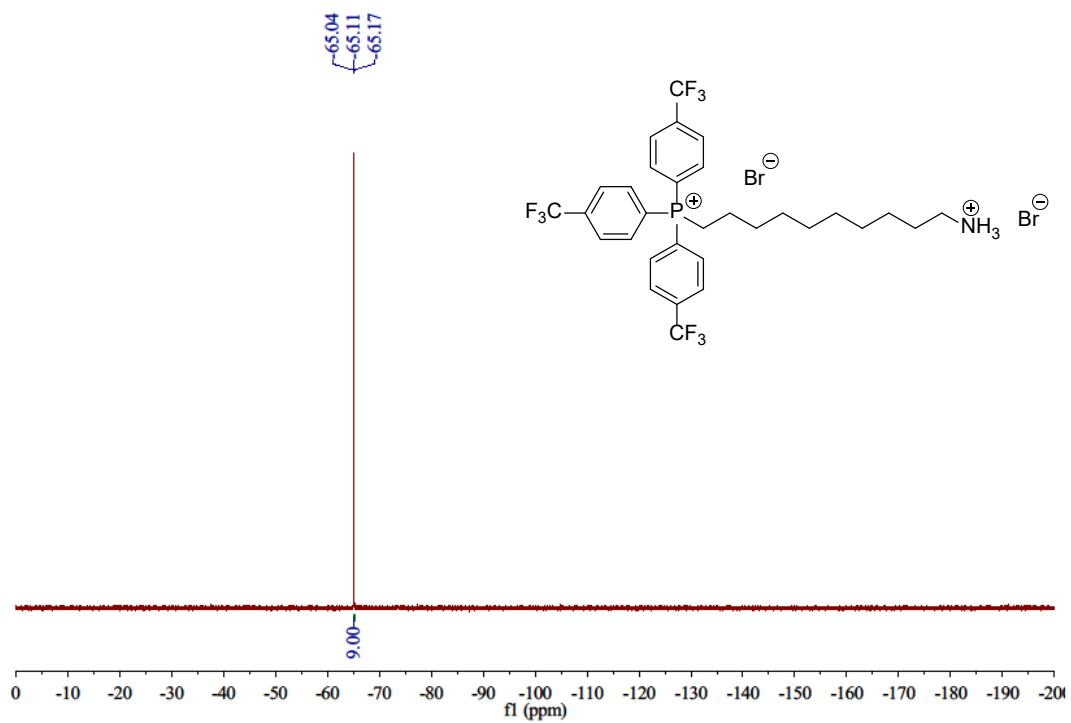

Supplemental Figure S39: <sup>19</sup>F NMR of 4-CF<sub>3</sub>-TPP-DC-NH<sub>2</sub> (40)

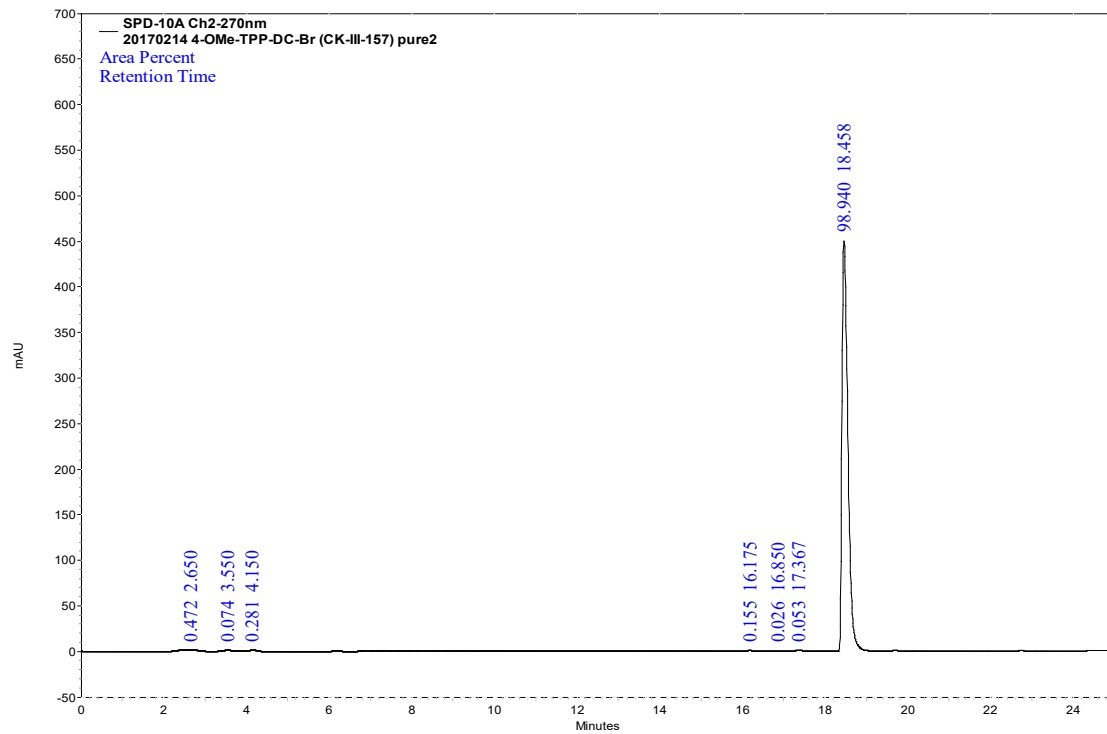

Supplemental Figure S40: HPLC chromatogram of 4-OMe-TPP-DC (15)

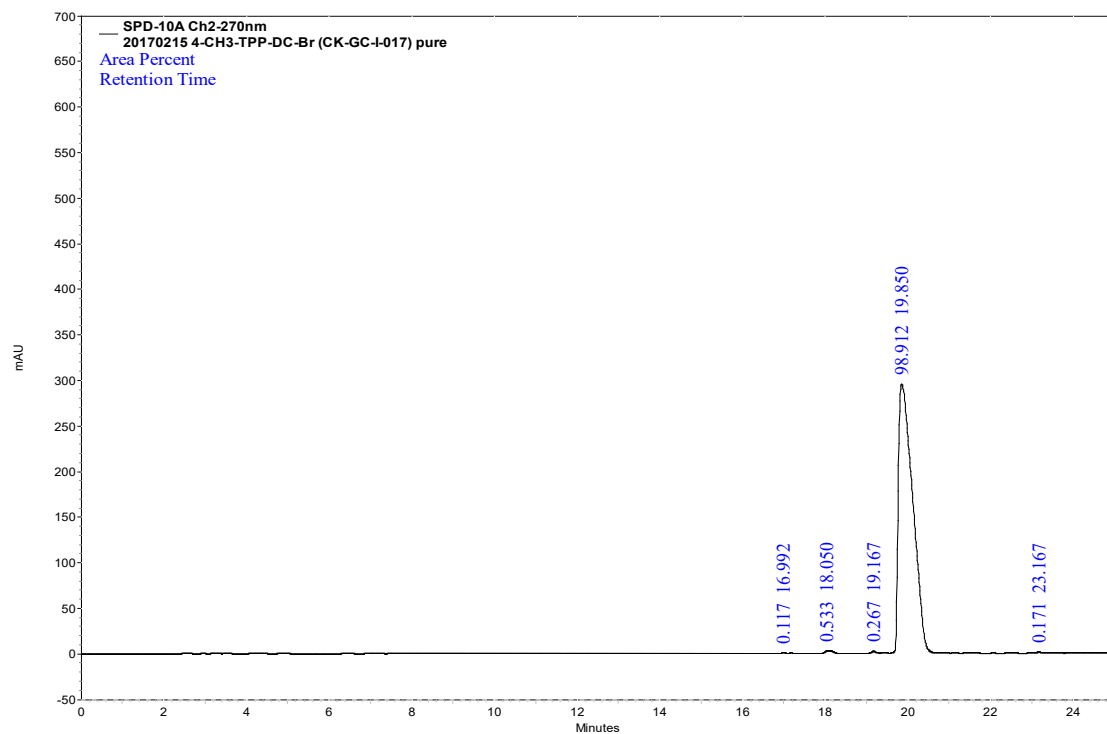

Supplemental Figure S41: HPLC chromatogram of 4-CH<sub>3</sub>-TPP-DC (10)

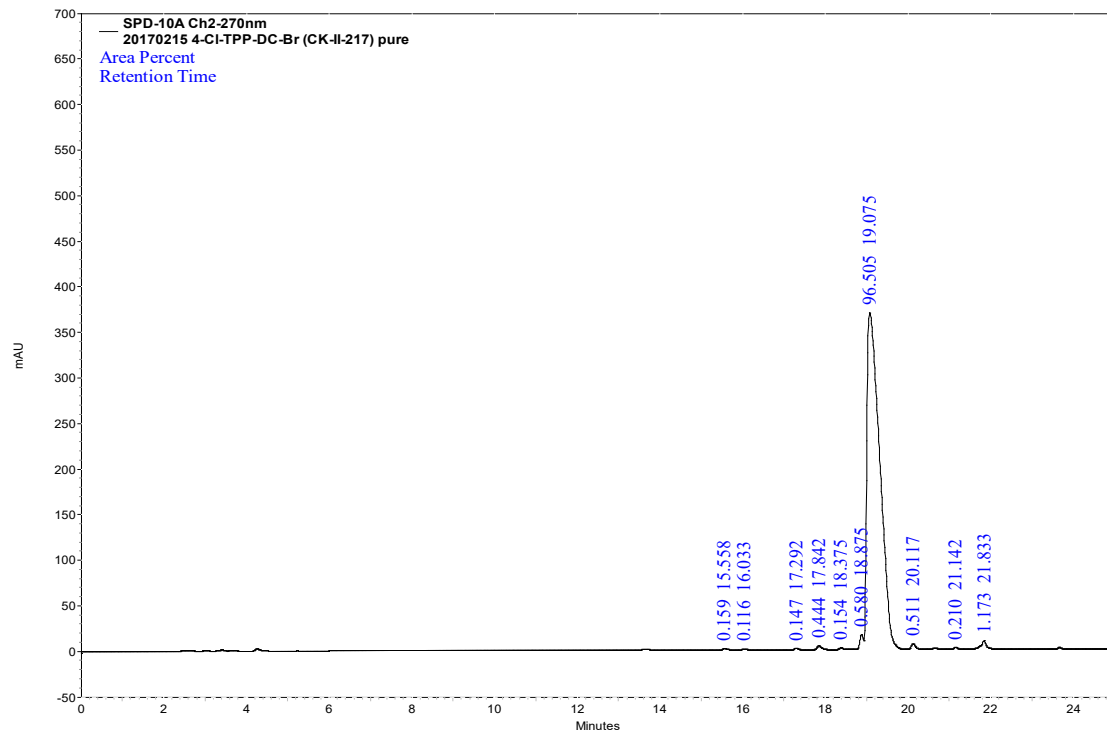

Supplemental Figure S42: HPLC chromatogram of 4-Cl-TPP-DC (12)

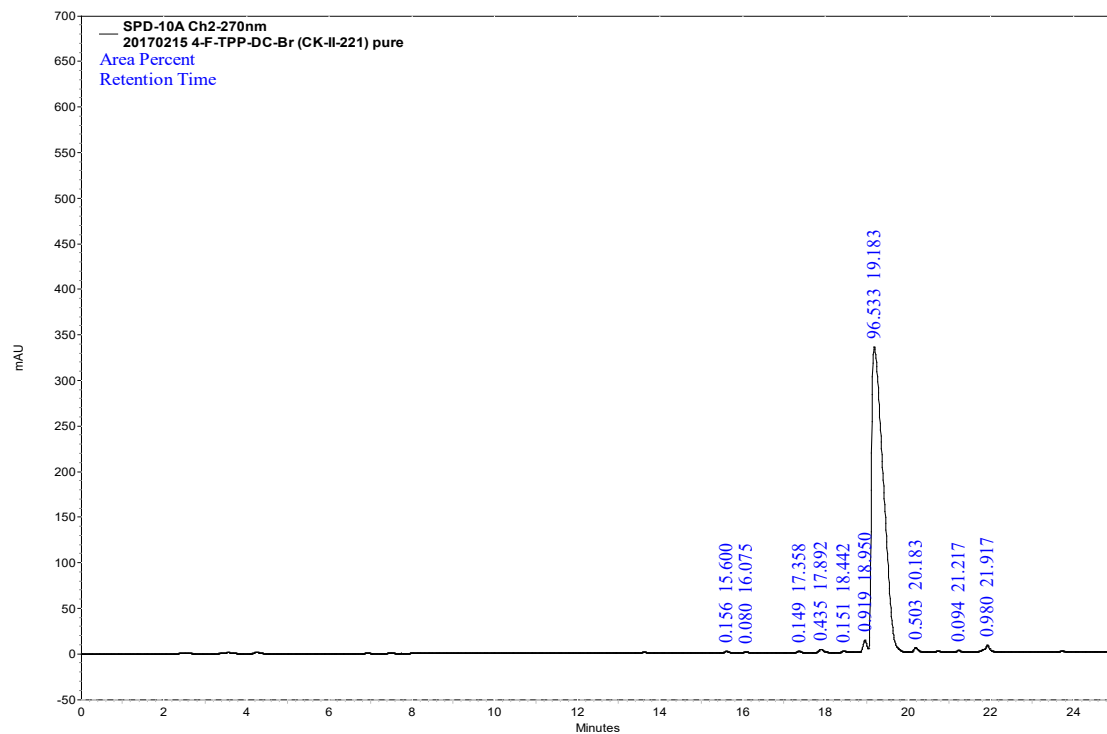

Supplemental Figure S43: HPLC chromatogram of 4-F-TPP-DC (13)



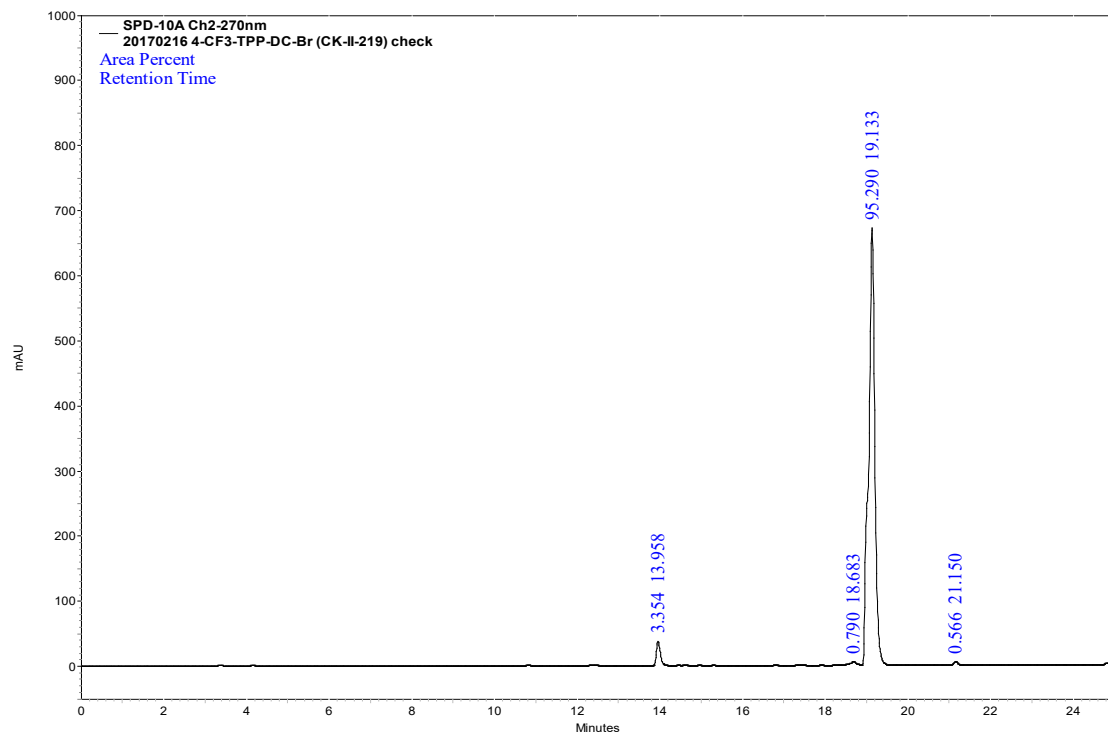

Supplemental Figure S44: HPLC chromatogram of 4-CF<sub>3</sub>-TPP-DC (**14**)

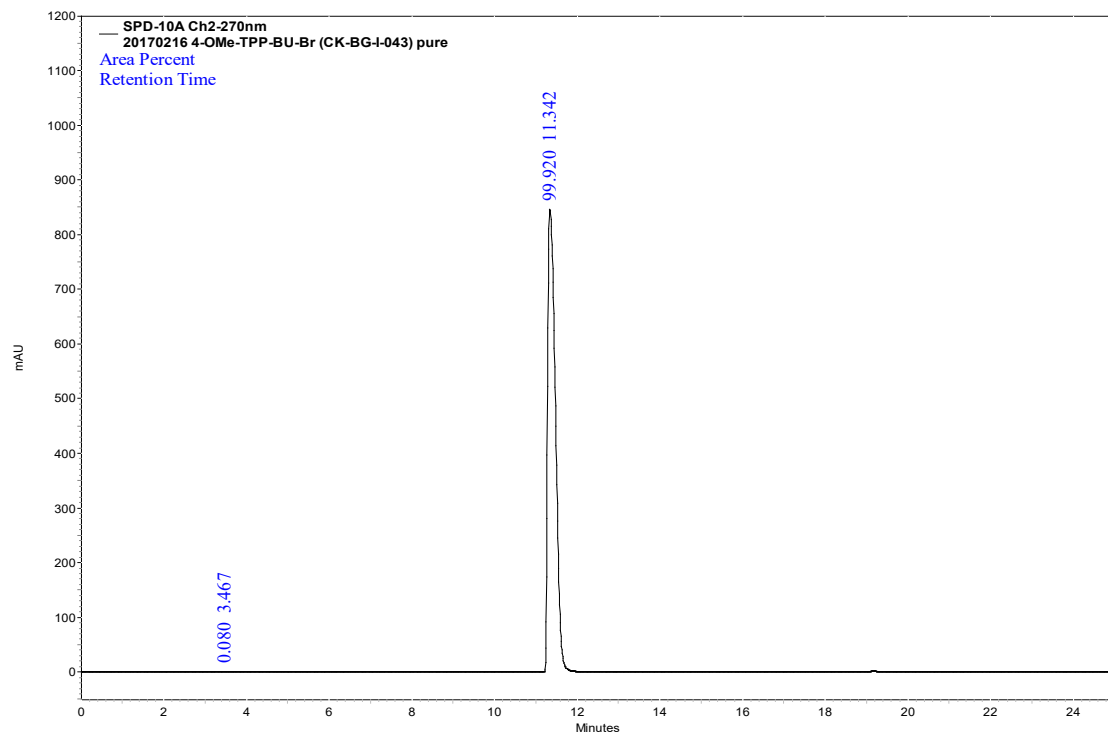

Supplemental Figure S45: HPLC chromatogram of 4-OMe-TPP-BU (**15**)

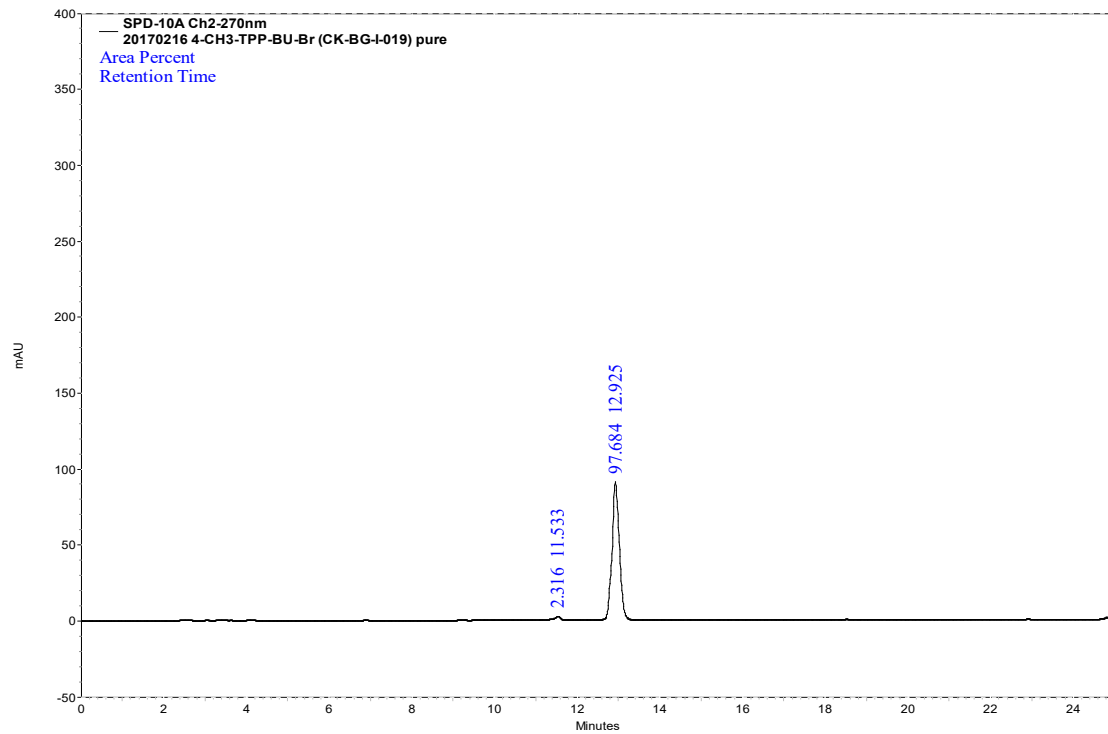

Supplemental Figure S46: HPLC chromatogram of 4-CH<sub>3</sub>-TPP-BU (16)

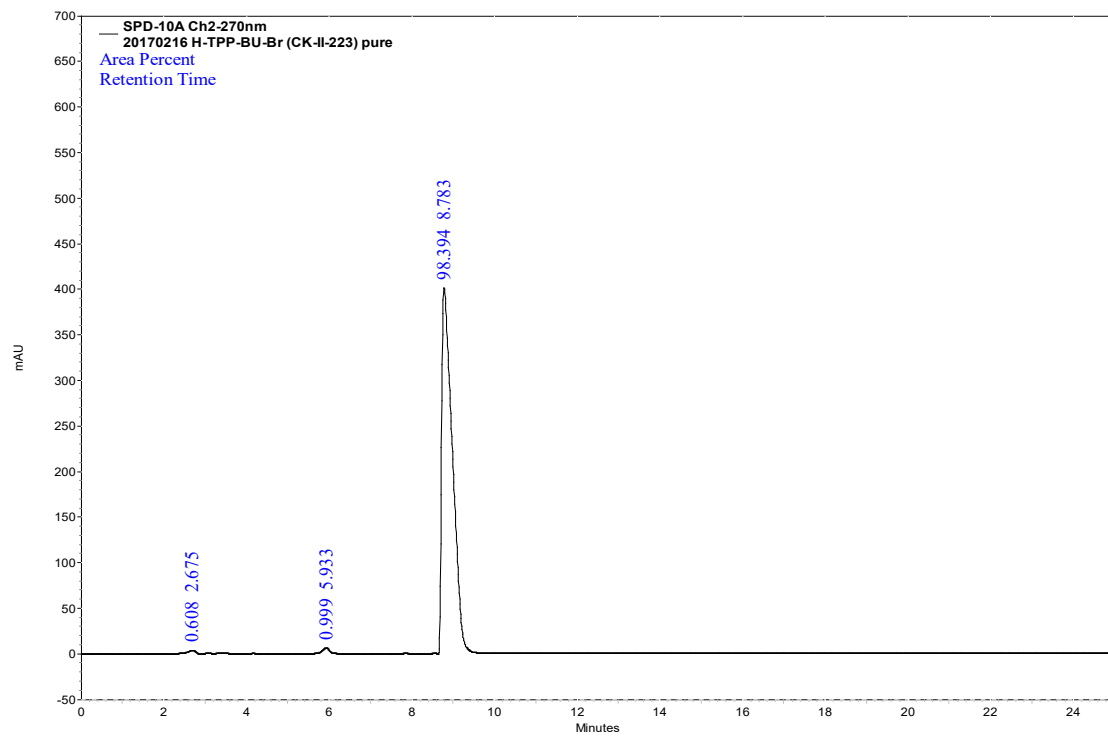

Supplemental Figure S47: HPLC chromatogram of H-TPP-BU (17)

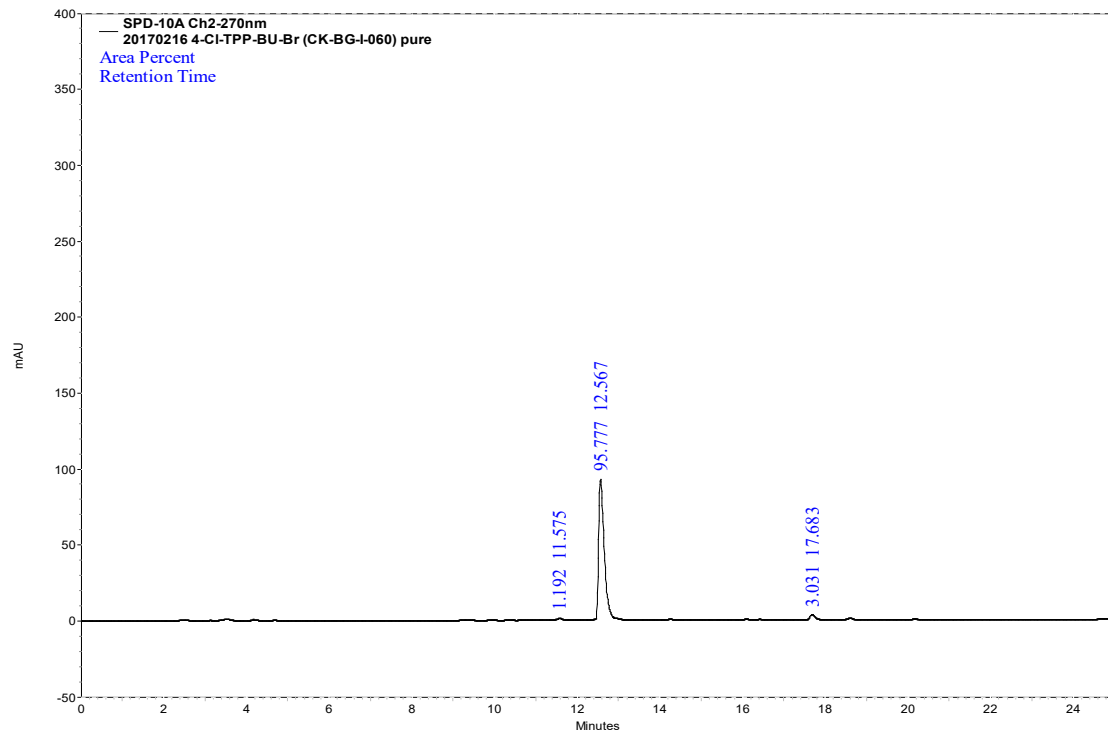

Supplemental Figure S48: HPLC chromatogram of 4-Cl-TPP-BU (**18**)

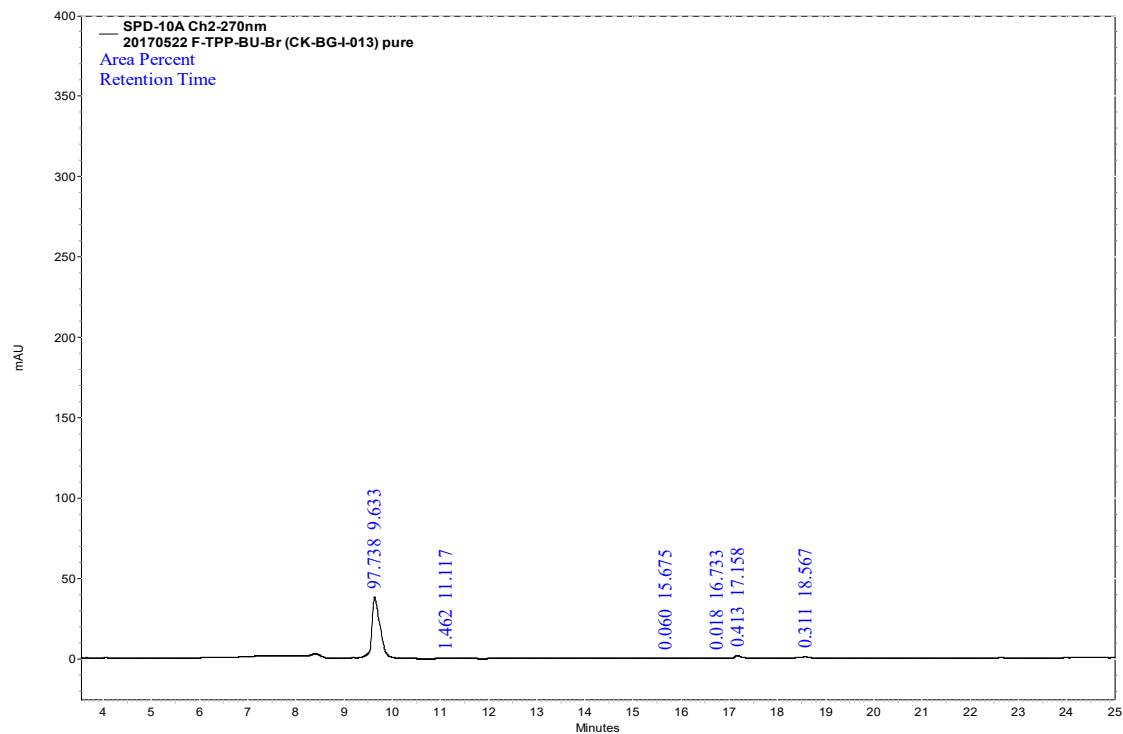

Supplemental Figure S49: HPLC chromatogram of 4-F-TPP-BU (**19**)

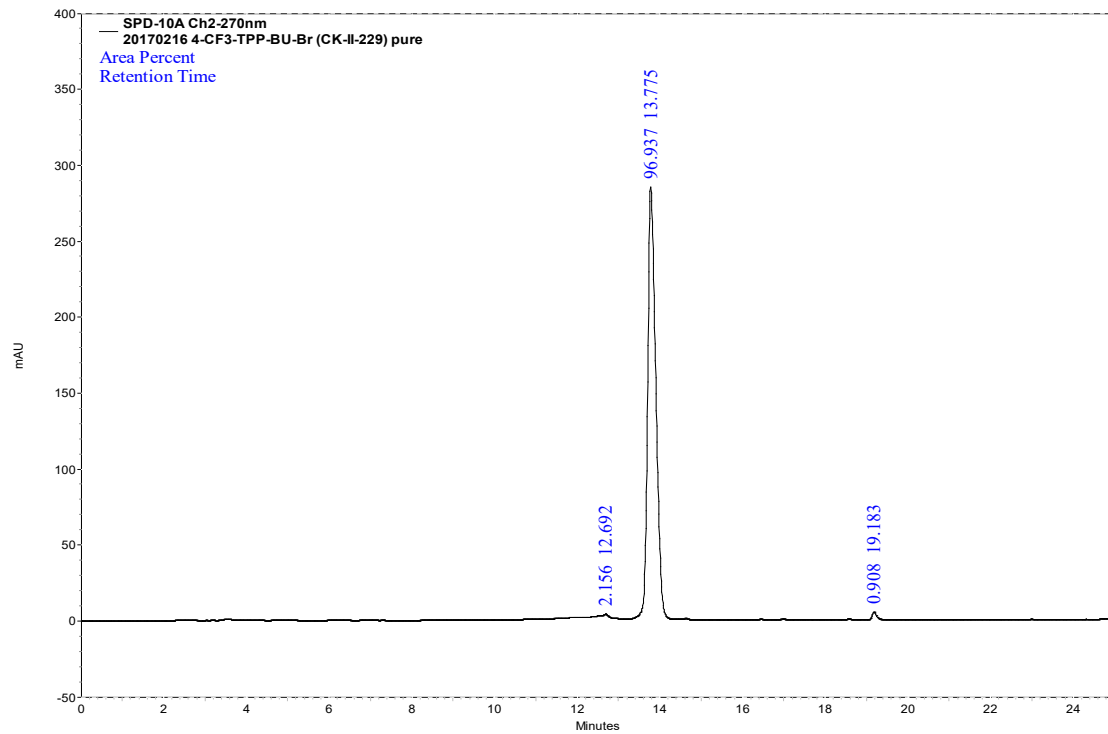

Supplemental Figure S50: HPLC chromatogram of 4-CF<sub>3</sub>-TPP-BU (**20**)

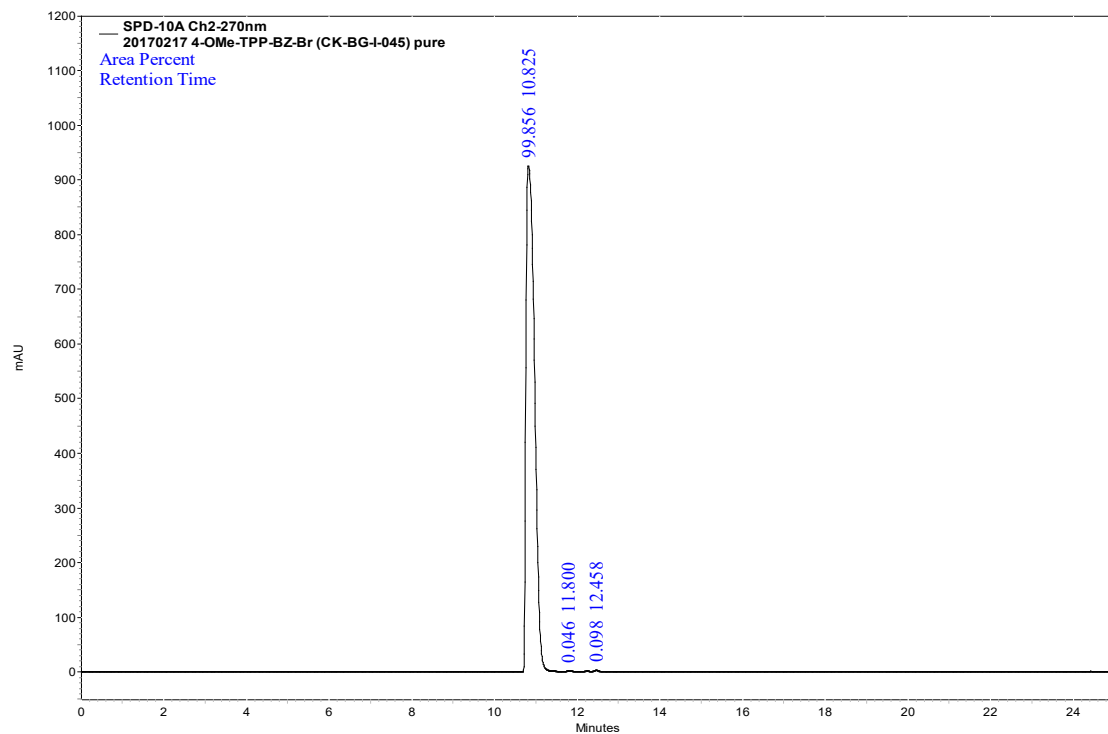

Supplemental Figure S51: HPLC chromatogram of 4-OMe-TPP-BZ (**22**)

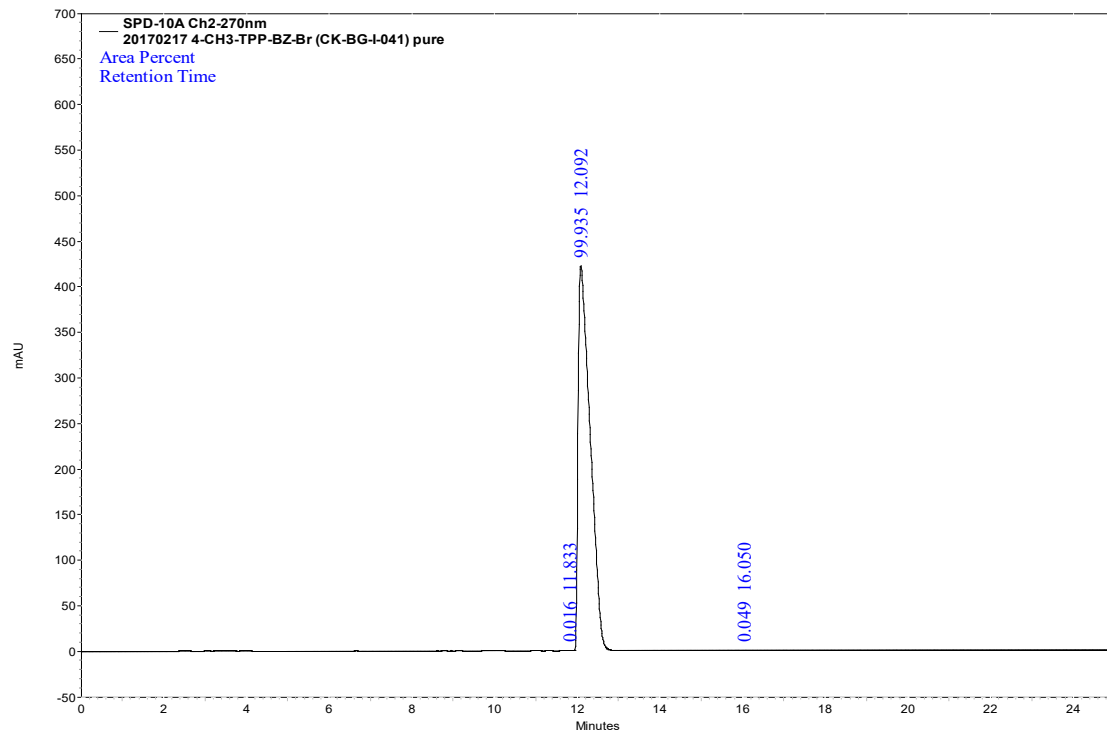

Supplemental Figure S52: HPLC chromatogram of 4-CH<sub>3</sub>-TPP-BZ (**23**)

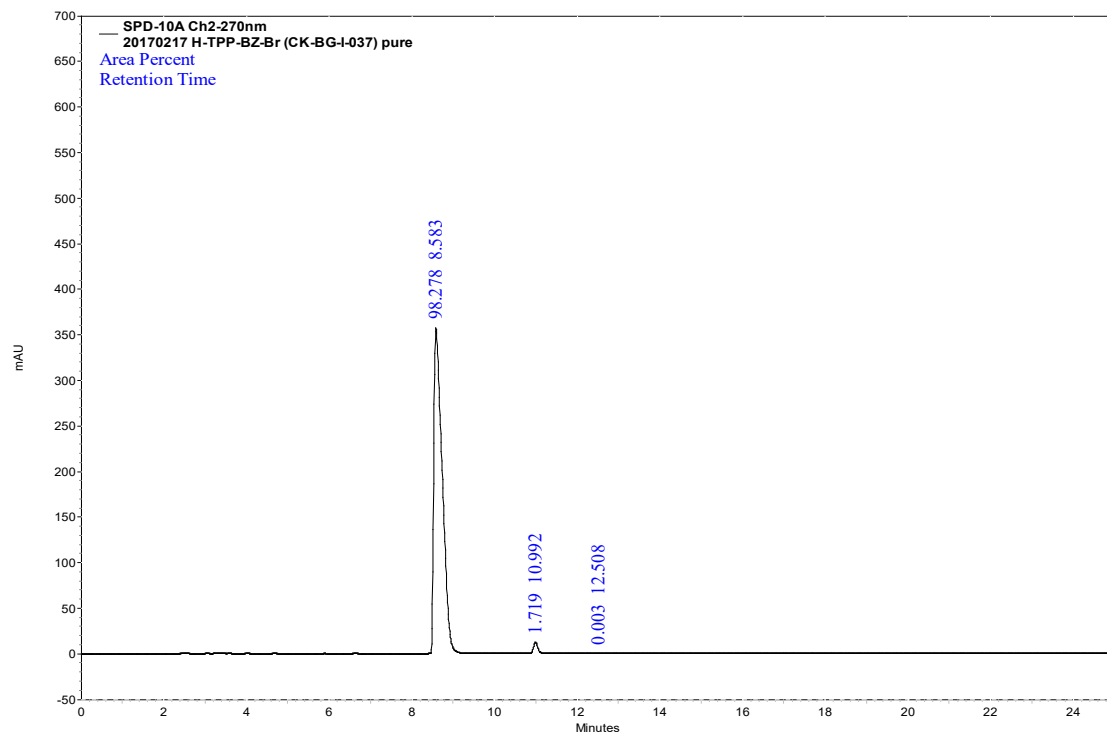

Supplemental Figure S53: HPLC chromatogram of H-TPP-BZ (**24**)

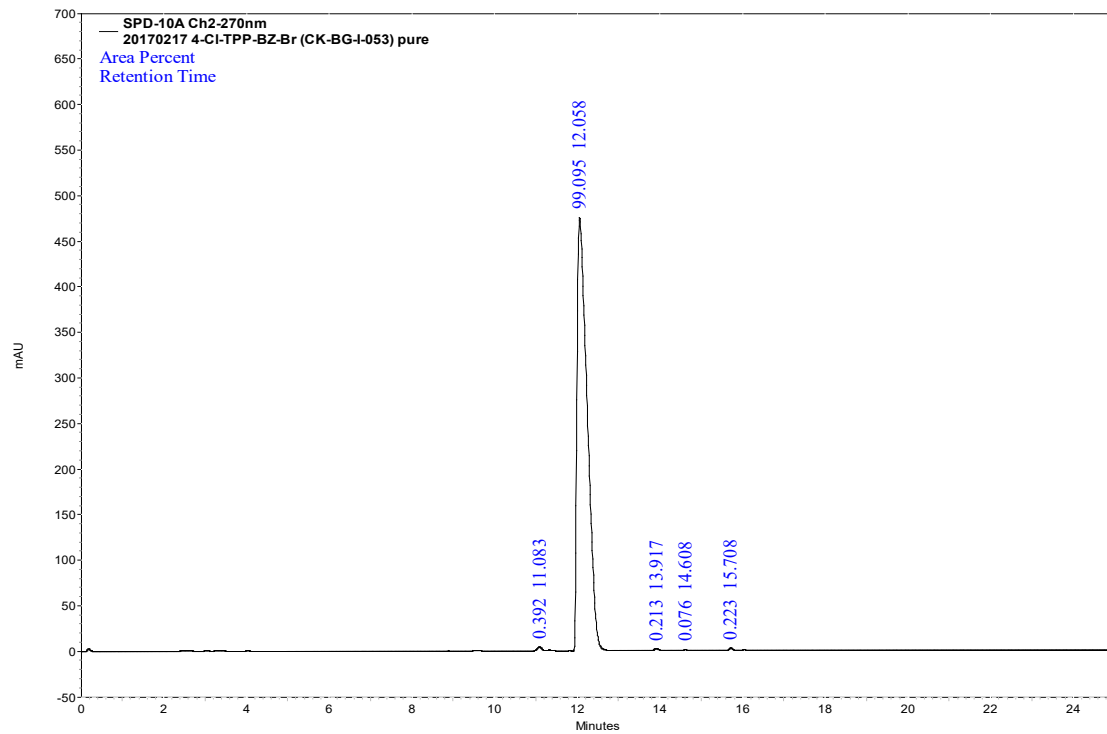

Supplemental Figure S54: HPLC chromatogram of 4-Cl-TPP-BZ (25)

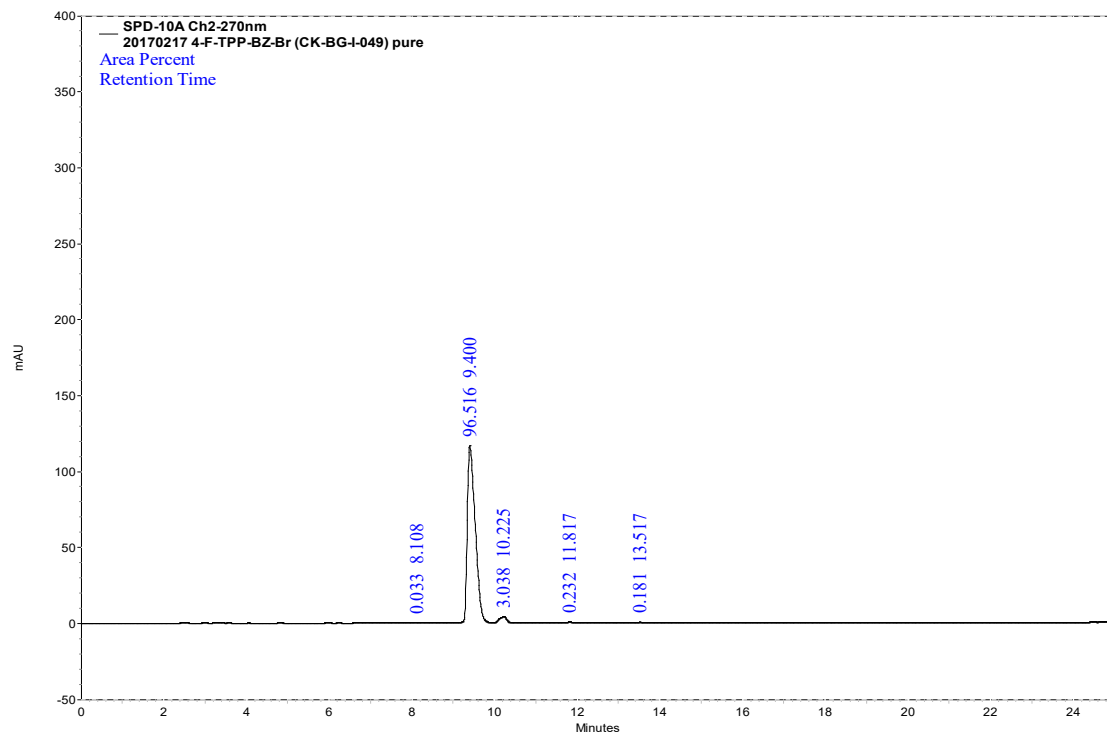

Supplemental Figure S55: HPLC chromatogram of 4-F-TPP-BZ (26)

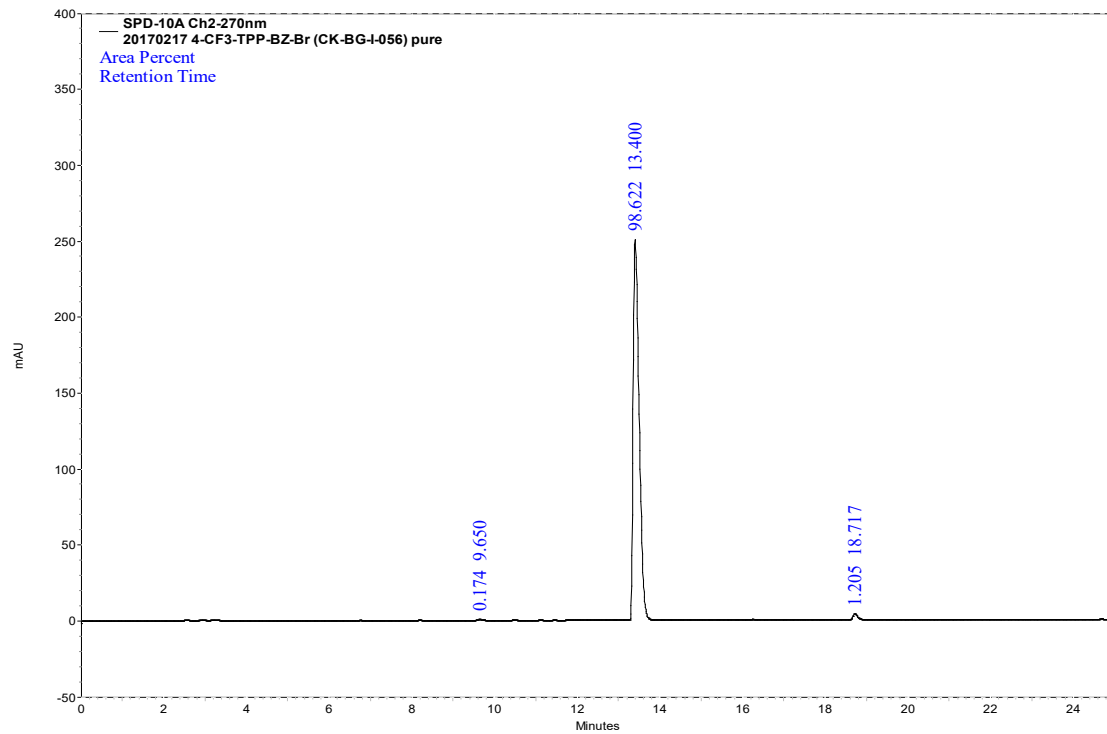

Supplemental Figure S56: HPLC chromatogram of 4-CF<sub>3</sub>-TPP-BZ (**27**)

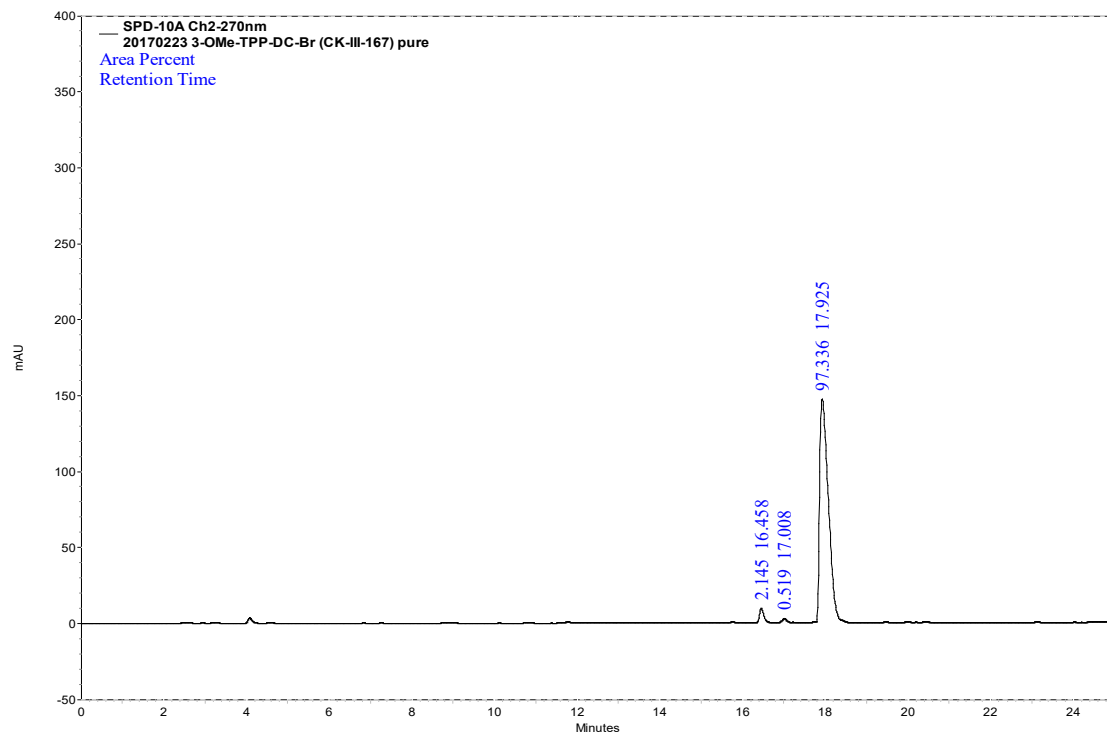

Supplemental Figure S57: HPLC chromatogram of 3-OMe-TPP-DC (**30**)

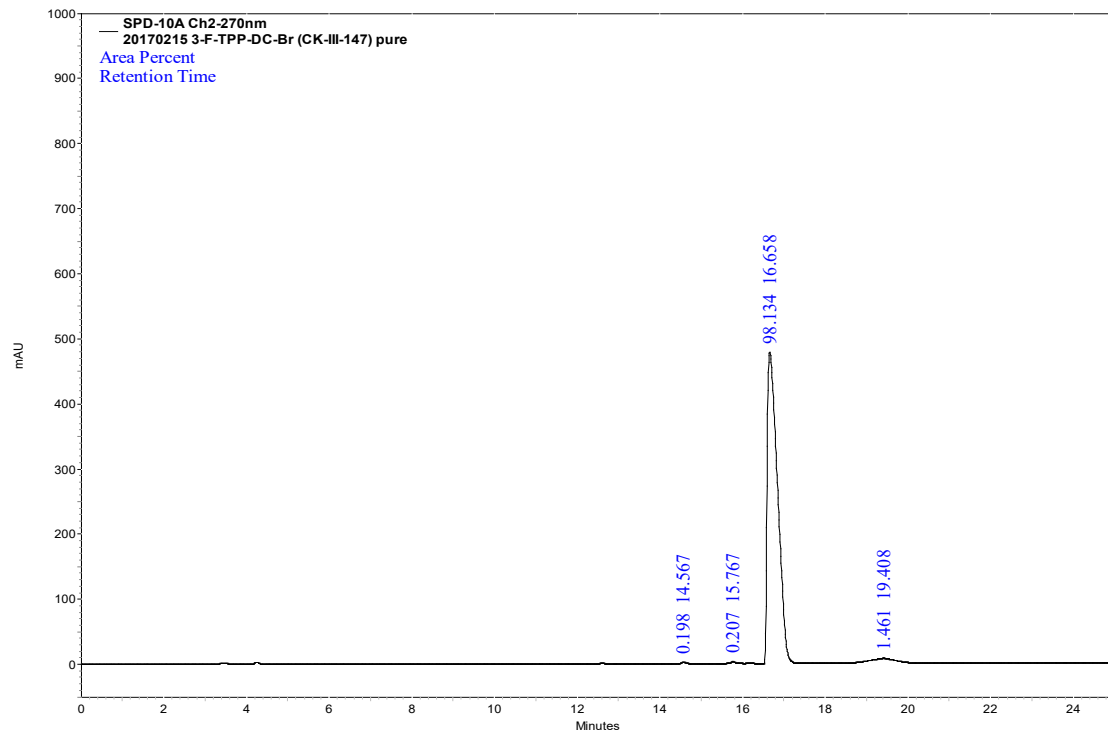

Supplemental Figure S58: HPLC chromatogram of 3-F-TPP-DC (**31**)

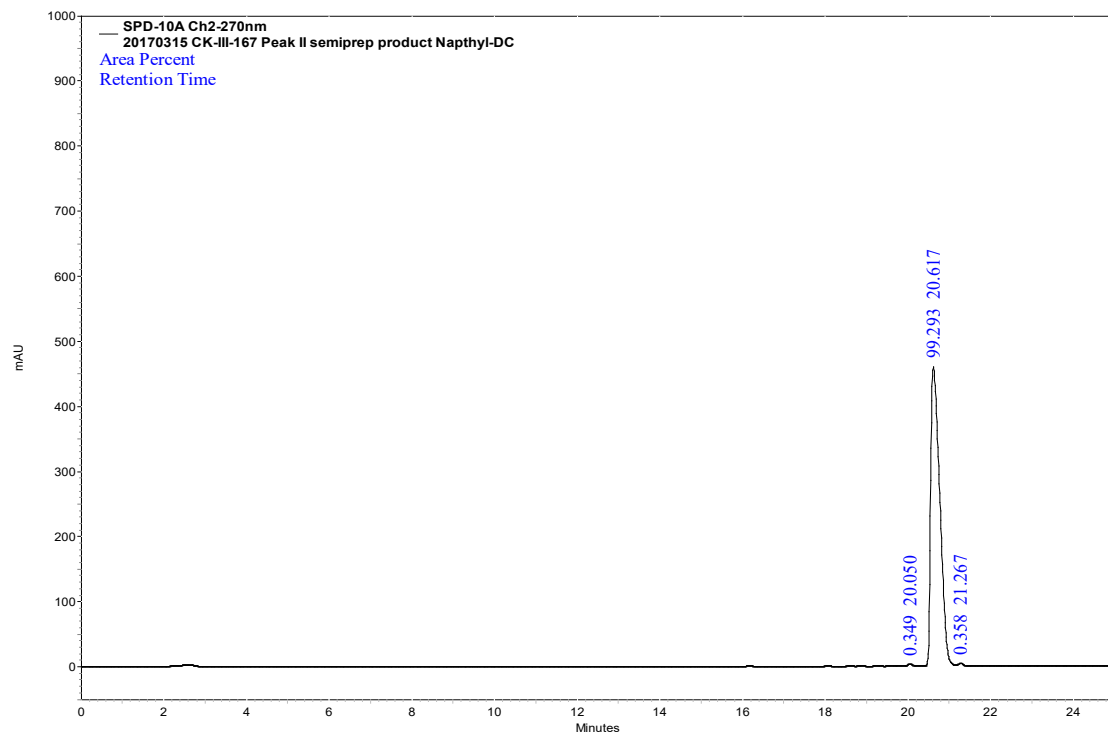

Supplemental Figure S59: HPLC chromatogram of Tri-Nap-P-DC-I (**33**)



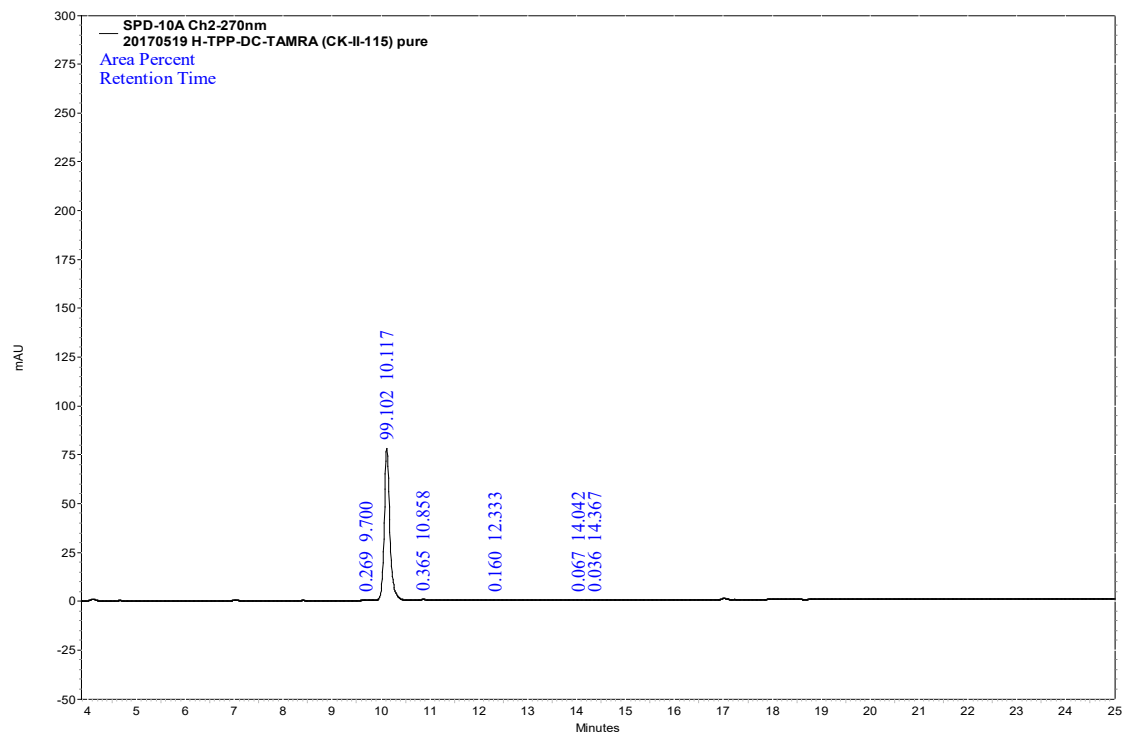

Supplemental Figure S60: HPLC chromatogram of H-TPP-DC-TAMRA (42)

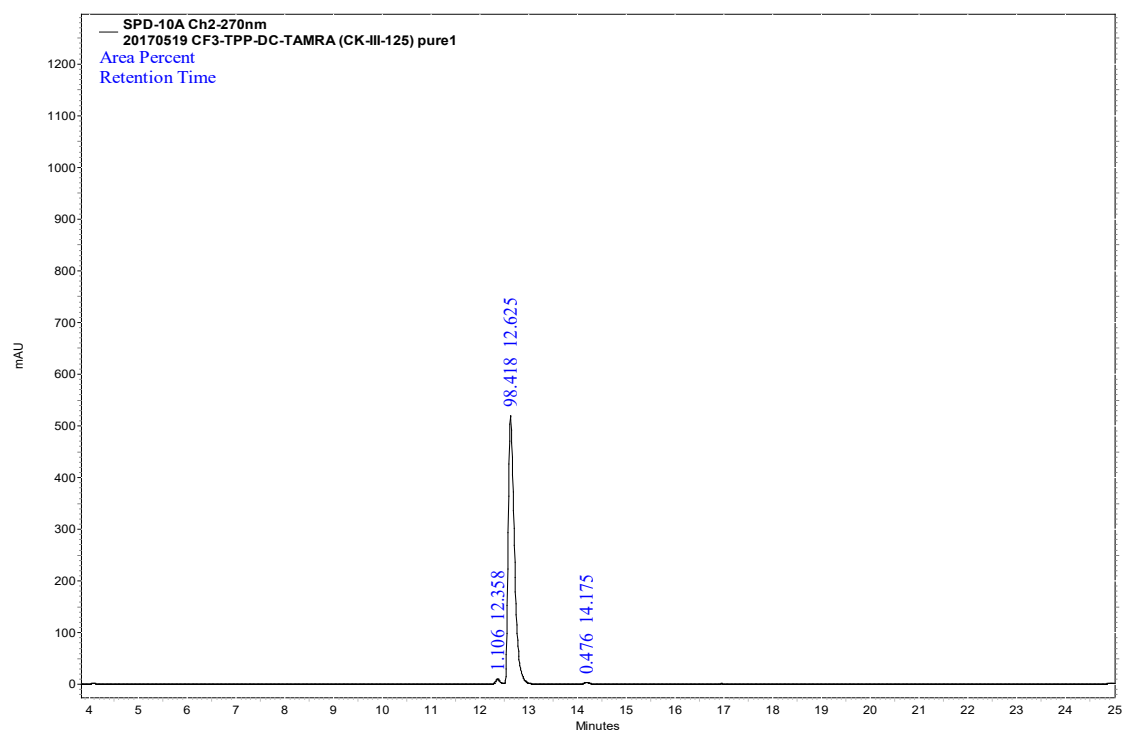

Supplemental Figure S61: HPLC chromatogram of 4-CF<sub>3</sub>-TPP-DC-TAMRA (43)
